# Supplementary material for: Mitochondrial Carriers Regulating Insulin Secretion Profiled in Human Islets upon Metabolic Stress
Source: PubMed Central journal article supplement (PMC7697104; doi:10.3390/biom10111543), 2020-11-12
Supplement: biomolecules-10-01543-s001.pdf [file biomolecules-10-01543-s001.pdf]

## **Mitochondrial carriers regulating insulin secretion profiled in human islets upon metabolic stress**

**Supplementary Table S1:** Clinical Data of the human donors of pancreatic islets, type of analyses performed and tested conditions.

**Supplementary Table S2:** Quantitative data related to the transcriptomic profiles of mitochondrial solute carriers and associated genes in human islets upon metabolic stress. NA: Not applicable, ND: not detected.

**Supplementary Table S3:** Quantitative data related to the transcriptomic profiles of the electron transport chain machinery and related mitochondrial carriers in human islets upon metabolic stress. NA: Not applicable, ND: not detected.

**Supplementary Table S4:** Quantitative data related to the transcriptomic profiles of the outer and inner mitochondrial membrane translocases TOM/TIM machinery in human islets upon metabolic stress. NA: Not applicable, ND: not detected.

**Supplementary Table S5:** Quantitative data related to the transcriptomic profiles of mitochondrial iron transport genes in human islets under metabolic stress. NA: Not applicable, ND: not detected.

**Supplementary Table S6:** Quantitative data related to the transcriptomic profiles of mitochondrial calcium transport genes in human islets upon metabolic stress. NA: Not applicable, ND: not detected.

**Supplementary Table S7:** Primers used for quantitative RT-PCR analysis

**Supplementary Figure S1:** Functional interaction network of human (a) mitochondrial calcium transport genes; (b) outer and inner mitochondrial membrane translocases TOM/TIM machinery; (c) electron transport chain machinery and related carriers; (d) mitochondrial iron transport genes. Nodes were connected using the STRING interaction knowledgebase with a confidence score >0.4.

**Supplementary Figure S2:** Effects of high 25 mM glucose (G25) and 0.4 mM oleate (Olea) or palmitate (Palm) on the transcriptional regulation of the electron transport chain machinery. Human islets were exposed to (a) Olea at G5.5, (b) Palm at G5.5, (c) G25, (d) G25+Olea+Palm, (e) G25+Olea, and (d) G25+Palm for 3 days before RNA-Seq analysis. Effects of culture conditions on transcript levels are compared to standard G5.5 medium and shown as upregulated (red), downregulated (blue), or unchanged (white). Missing values are represented in grey. Each disk is split into individual changes for the

different donors. Color code reflects the transcriptional changes in log<sub>2</sub> fold changes (log<sub>2</sub> FC) for that particular gene in individual donors. \*adjusted p < 0.05, \*\*adjusted p < 0.01, \*\*\*adjusted p < 0.001 between control 5.5 mM glucose and the specific culture condition.

**Supplementary Figure S3:** Effects of high 25 mM glucose (G25) and 0.4 mM oleate (Olea) or palmitate (Palm) on the transcriptional regulation of mitochondrial iron transport genes. Human islets were exposed to (a) Olea at G5.5, (b) Palm at G5.5, (c) G25, (d) G25+Olea+Palm, (e) G25+Olea, and (f) G25+Palm for 3 days before RNA-Seq analysis. Effects of culture conditions on transcript levels are compared to standard G5.5 medium and shown as upregulated (red), downregulated (blue), or unchanged (white). Missing values are represented in grey. Each disk is split into individual changes for the different donors. Color code reflects the transcriptional changes in log<sub>2</sub> fold changes (log<sub>2</sub> FC) for that particular gene in individual donors. \*adjusted p < 0.05, \*\*adjusted p < 0.01, \*\*\*adjusted p < 0.001 between control 5.5 mM glucose and the specific culture condition.

**Supplementary Figure S4:** Effects of high 25 mM glucose (G25) and 0.4 mM oleate (Olea) or palmitate (Palm) on the mRNA levels of selected genes in human islets measured by quantitative RT-PCR, normalized to cyclophilin A (*PPIA*).

**Supplementary Table S1:** Clinical Data of the human donors of pancreatic islets, type of analyses performed and tested conditions (25 mM glucose, G25; 0.4 mM oleate, Olea; 0.4 mM palmitate, Palm; 0.2 mM oleate plus 0.2 mM palmitate, Olea+Palm). \* DOI: 10.1093/hmg/ddv247

| Donor | Gender | Age (years) | BMI (kg/m <sup>2</sup> ) | Cause of death       | Culture (days) | Viability (%) | Purity (%)  | Type of analysis performed                               | Tested conditions in RNA-Seq analyses  |
|-------|--------|-------------|--------------------------|----------------------|----------------|---------------|-------------|----------------------------------------------------------|----------------------------------------|
| #1    | M      | 56          | 28.6                     | Crania trauma        | 3              | 90            | 50          | RNA-Seq, qRT-PCR, and previously published* NanoString®  | Olea, Palm, G25                        |
| #2    | M      | 59          | 27.2                     | Trauma               | 2              | 90            | 60          | RNA-Seq, Q-RT-PCR, and previously published* NanoString® | Olea, Palm, G25                        |
| #3    | F      | 41          | 22.4                     | Cerebral haemorrhage | 2              | 90            | 80          | RNA-Seq                                                  | G25, G25+Olea+Palm, G25+Olea, G25+Palm |
| #4    | M      | 46          | 27.2                     | Cerebral haemorrhage | 2              | 90            | 75          | RNA-Seq, qRT-PCR                                         | G25, G25+Olea                          |
| #5    | F      | 59          | 23.7                     | Cerebral trauma      | 4              | 90            | 84          | RNA-Seq                                                  | G25+Olea+Palm, G25+Olea, G25+Palm      |
| #6    | M      | 43          | 23.2                     | Crania trauma        | 1              | 95            | 87          | qRT-PCR, and previously published* NanoString®           |                                        |
| #7    | M      | 59          | 25.6                     | Cerebral haemorrhage | 3              | 90            | 75          | qRT-PCR                                                  |                                        |
| #8    | M      | 49          | 26.2                     | Cerebral haemorrhage | 5              | 90            | 84          | qRT-PCR                                                  |                                        |
| M (6) | 75%    | 52.0 ± 6.9  | 26.3 ± 1.8               |                      | 2.7 ± 1.3      | 90.8 ± 2.0    | 71.8 ± 14.2 |                                                          |                                        |

---

|         |      |                 |                |               |                 |                 |
|---------|------|-----------------|----------------|---------------|-----------------|-----------------|
| F (2)   | 25%  | $50.0 \pm 12.7$ | $23.1 \pm 0.9$ | $3.0 \pm 1.4$ | $90 \pm 0$      | $82.0 \pm 2.8$  |
| All (8) | 100% | $51.5 \pm 7.6$  | $25.5 \pm 2.2$ | $2.8 \pm 1.3$ | $90.6 \pm 1.80$ | $74.3 \pm 13.0$ |

---

**Supplementary Table S2.** Quantitative data related to the transcriptomic profiles of mitochondrial solute carriers and associated genes in human islets upon metabolic stress. NA: Not applicable (condition not tested); ND: not detected.

|              | Accession (NCBI Ref. Sequence) | Gene symbol | Donor #1            |                   | Donor #2            |                   | Donor #3            |                   | Donor #4            |                   | Donor #5            |                   |
|--------------|--------------------------------|-------------|---------------------|-------------------|---------------------|-------------------|---------------------|-------------------|---------------------|-------------------|---------------------|-------------------|
|              |                                |             | Log <sub>2</sub> FC | Adjusted <i>p</i> | Log <sub>2</sub> FC | Adjusted <i>p</i> | Log <sub>2</sub> FC | Adjusted <i>p</i> | Log <sub>2</sub> FC | Adjusted <i>p</i> | Log <sub>2</sub> FC | Adjusted <i>p</i> |
| Olea         | NM_001098                      | ACO2        | 0.341               | 0.425             | 0.123               | 0.858             | NA                  | NA                | 0.115               | 0.831             | NA                  | NA                |
|              | NM_004077                      | CS          | -0.134              | 0.760             | 0.097               | 0.882             | NA                  | NA                | -0.089              | 0.880             | NA                  | NA                |
|              | NM_000143                      | FH          | -0.081              | 0.890             | 0.047               | 0.965             | NA                  | NA                | -0.211              | 0.643             | NA                  | NA                |
|              | NM_012084                      | GLUD2       | ND                  | ND                | ND                  | ND                | NA                  | NA                | -0.307              | 0.816             | NA                  | NA                |
|              | NM_002080                      | GOT2        | -0.259              | 0.493             | 0.079               | 0.913             | NA                  | NA                | 0.031               | 0.975             | NA                  | NA                |
|              | NM_002168                      | IDH2        | 0.219               | 0.642             | -0.009              | 1.000             | NA                  | NA                | 0.351               | 0.385             | NA                  | NA                |
|              | NM_005530                      | IDH3A       | -0.552              | 0.123             | -0.285              | 0.557             | NA                  | NA                | -0.132              | 0.801             | NA                  | NA                |
|              | NM_174855                      | IDH3B       | -0.586              | 0.157             | 0.386               | 0.443             | NA                  | NA                | 0.323               | 0.429             | NA                  | NA                |
|              | NM_174869                      | IDH3G       | 0.371               | 0.502             | 0.290               | 0.590             | NA                  | NA                | 0.241               | 0.584             | NA                  | NA                |
|              | NM_001282404                   | MDH2        | 0.139               | 0.755             | 0.180               | 0.728             | NA                  | NA                | 0.063               | 0.923             | NA                  | NA                |
|              | NM_016098                      | MPC1        | -0.525              | 0.214             | 0.221               | 0.733             | NA                  | NA                | -0.242              | 0.590             | NA                  | NA                |
|              | NM_001143674                   | MPC2        | -0.591              | 0.066             | 0.161               | 0.771             | NA                  | NA                | 0.170               | 0.712             | NA                  | NA                |
|              | NM_001165036                   | OGDH        | 0.864               | 0.006             | 0.069               | 0.930             | NA                  | NA                | 0.081               | 0.891             | NA                  | NA                |
|              | NM_000920                      | PC          | 0.559               | 0.410             | -0.152              | 0.875             | NA                  | NA                | -0.157              | 0.772             | NA                  | NA                |
|              | NM_004563                      | PCK2        | 1.107               | 0.001             | 0.093               | 0.895             | NA                  | NA                | 0.270               | 0.508             | NA                  | NA                |
|              | NM_001173456                   | PDHA1       | 0.218               | 0.636             | 0.071               | 0.935             | NA                  | NA                | 0.165               | 0.733             | NA                  | NA                |
|              | NM_001173468                   | PDHB        | -0.428              | 0.248             | 0.093               | 0.899             | NA                  | NA                | 0.178               | 0.714             | NA                  | NA                |
|              | NM_003477                      | PDHX        | -0.101              | 0.864             | -0.443              | 0.349             | NA                  | NA                | -0.269              | 0.523             | NA                  | NA                |
|              | NM_002610                      | PDK1        | 0.456               | 0.464             | -0.269              | 0.704             | NA                  | NA                | 1.106               | 0.000             | NA                  | NA                |
|              | NM_001199898                   | PDK2        | 0.910               | 0.080             | 0.362               | 0.517             | NA                  | NA                | 0.610               | 0.088             | NA                  | NA                |
| NM_001142386 | PDK3                           | -0.132      | 0.761               | -0.299            | 0.501               | NA                | NA                  | 0.066             | 0.915               | NA                | NA                  |                   |
| NM_002612    | PDK4                           | 0.051       | 0.934               | 0.038             | 0.972               | NA                | NA                  | -0.544            | 0.077               | NA                | NA                  |                   |
| NM_001294332 | SDHA                           | -0.219      | 0.627               | 0.026             | 0.995               | NA                | NA                  | -0.189            | 0.679               | NA                | NA                  |                   |

|      |              |          |        |       |        |       |    |    |        |       |    |    |
|------|--------------|----------|--------|-------|--------|-------|----|----|--------|-------|----|----|
|      | NM_003000    | SDHB     | 0.140  | 0.801 | 0.444  | 0.308 | NA | NA | 0.011  | 1.000 | NA | NA |
|      | NM_003001    | SDHC     | -0.148 | 0.795 | -0.231 | 0.704 | NA | NA | 0.267  | 0.538 | NA | NA |
|      | NM_001276503 | SDHD     | -0.169 | 0.728 | 0.165  | 0.793 | NA | NA | -0.190 | 0.697 | NA | NA |
|      | NM_005984    | SLC25A1  | 0.611  | 0.146 | 0.435  | 0.320 | NA | NA | 0.292  | 0.450 | NA | NA |
|      | NM_012140    | SLC25A10 | 1.458  | 0.005 | 0.746  | 0.108 | NA | NA | 0.435  | 0.252 | NA | NA |
|      | NM_001165418 | SLC25A11 | 0.857  | 0.042 | 0.509  | 0.267 | NA | NA | -0.036 | 0.968 | NA | NA |
|      | NM_003705    | SLC25A12 | -0.185 | 0.737 | -0.291 | 0.584 | NA | NA | -0.301 | 0.480 | NA | NA |
|      | NM_001160210 | SLC25A13 | -0.396 | 0.334 | 0.216  | 0.730 | NA | NA | -0.045 | 0.962 | NA | NA |
|      | NM_014252    | SLC25A15 | 0.119  | 0.955 | -1.011 | 0.066 | NA | NA | -0.130 | 0.886 | NA | NA |
|      | NM_001303484 | SLC25A18 | ND     | ND    | ND     | ND    | NA | NA | 0.226  | 0.817 | NA | NA |
|      | NM_000387    | SLC25A20 | -0.210 | 0.731 | 0.330  | 0.567 | NA | NA | -0.276 | 0.535 | NA | NA |
|      | NM_001191061 | SLC25A22 | 1.905  | 0.000 | 0.496  | 0.240 | NA | NA | 0.030  | 0.975 | NA | NA |
|      | NM_001039355 | SLC25A29 | 0.508  | 0.298 | 0.216  | 0.731 | NA | NA | 0.565  | 0.075 | NA | NA |
|      | NM_178526    | SLC25A42 | 0.543  | 0.462 | 0.015  | 1.000 | NA | NA | 0.224  | 0.637 | NA | NA |
|      | NM_198580    | SLC27A1  | 2.010  | 0.000 | 0.310  | 0.621 | NA | NA | 0.608  | 0.078 | NA | NA |
|      | NM_003850    | SUCLA2   | -0.514 | 0.162 | -0.009 | 1.000 | NA | NA | -0.632 | 0.057 | NA | NA |
|      | NM_003849    | SUCLG1   | -0.662 | 0.042 | 0.229  | 0.655 | NA | NA | -0.302 | 0.442 | NA | NA |
|      | NM_001177599 | SUCLG2   | -0.323 | 0.580 | -0.076 | 0.948 | NA | NA | -0.025 | 0.994 | NA | NA |
|      | NM_003355    | UCP2     | 0.167  | 0.829 | 0.252  | 0.685 | NA | NA | 0.257  | 0.619 | NA | NA |
| Palm | NM_001098    | ACO2     | 0.334  | 0.455 | 0.037  | 1.000 | NA | NA | NA     | NA    | NA | NA |
|      | NM_004077    | CS       | -0.159 | 0.741 | -0.139 | 1.000 | NA | NA | NA     | NA    | NA | NA |
|      | NM_000143    | FH       | 0.130  | 0.818 | -0.111 | 1.000 | NA | NA | NA     | NA    | NA | NA |
|      | NM_012084    | GLUD2    | ND     | ND    | ND     | ND    | NA | NA | NA     | NA    | NA | NA |
|      | NM_002080    | GOT2     | -0.258 | 0.524 | -0.062 | 1.000 | NA | NA | NA     | NA    | NA | NA |
|      | NM_002168    | IDH2     | -0.038 | 1.000 | 0.045  | 1.000 | NA | NA | NA     | NA    | NA | NA |
|      | NM_005530    | IDH3A    | -0.199 | 0.681 | -0.347 | 1.000 | NA | NA | NA     | NA    | NA | NA |
|      | NM_174855    | IDH3B    | -0.076 | 0.939 | 0.334  | 1.000 | NA | NA | NA     | NA    | NA | NA |
|      | NM_174869    | IDH3G    | 0.309  | 0.618 | -0.122 | 1.000 | NA | NA | NA     | NA    | NA | NA |

|              |          |        |       |        |       |    |    |    |    |    |    |
|--------------|----------|--------|-------|--------|-------|----|----|----|----|----|----|
| NM_001282404 | MDH2     | 0.256  | 0.524 | -0.182 | 1.000 | NA | NA | NA | NA | NA | NA |
| NM_016098    | MPC1     | 0.229  | 0.669 | 0.041  | 1.000 | NA | NA | NA | NA | NA | NA |
| NM_001143674 | MPC2     | -0.151 | 0.758 | 0.181  | 1.000 | NA | NA | NA | NA | NA | NA |
| NM_001165036 | OGDH     | 0.342  | 0.426 | 0.131  | 1.000 | NA | NA | NA | NA | NA | NA |
| NM_000920    | PC       | 0.856  | 0.156 | 0.281  | 1.000 | NA | NA | NA | NA | NA | NA |
| NM_004563    | PCK2     | 1.223  | 0.000 | 0.053  | 1.000 | NA | NA | NA | NA | NA | NA |
| NM_001173456 | PDHA1    | 0.217  | 0.673 | -0.080 | 1.000 | NA | NA | NA | NA | NA | NA |
| NM_001173468 | PDHB     | -0.113 | 0.851 | 0.014  | 1.000 | NA | NA | NA | NA | NA | NA |
| NM_003477    | PDHX     | -0.124 | 0.857 | -0.057 | 1.000 | NA | NA | NA | NA | NA | NA |
| NM_002610    | PDK1     | 0.320  | 0.681 | 0.254  | 1.000 | NA | NA | NA | NA | NA | NA |
| NM_001199898 | PDK2     | 0.976  | 0.066 | 0.045  | 1.000 | NA | NA | NA | NA | NA | NA |
| NM_001142386 | PDK3     | -0.103 | 0.851 | 0.092  | 1.000 | NA | NA | NA | NA | NA | NA |
| NM_002612    | PDK4     | 0.801  | 0.004 | 1.039  | 0.004 | NA | NA | NA | NA | NA | NA |
| NM_001294332 | SDHA     | -0.225 | 0.663 | 0.043  | 1.000 | NA | NA | NA | NA | NA | NA |
| NM_003000    | SDHB     | 0.195  | 0.724 | 0.136  | 1.000 | NA | NA | NA | NA | NA | NA |
| NM_003001    | SDHC     | -0.371 | 0.466 | -0.261 | 1.000 | NA | NA | NA | NA | NA | NA |
| NM_001276503 | SDHD     | 0.060  | 0.959 | 0.088  | 1.000 | NA | NA | NA | NA | NA | NA |
| NM_005984    | SLC25A1  | 0.591  | 0.184 | 0.295  | 1.000 | NA | NA | NA | NA | NA | NA |
| NM_012140    | SLC25A10 | 1.161  | 0.045 | 0.329  | 1.000 | NA | NA | NA | NA | NA | NA |
| NM_001165418 | SLC25A11 | 1.096  | 0.006 | 0.279  | 1.000 | NA | NA | NA | NA | NA | NA |
| NM_003705    | SLC25A12 | 0.243  | 0.639 | -0.102 | 1.000 | NA | NA | NA | NA | NA | NA |
| NM_001160210 | SLC25A13 | -0.082 | 0.929 | 0.009  | 1.000 | NA | NA | NA | NA | NA | NA |
| NM_014252    | SLC25A15 | 0.071  | 0.970 | -0.446 | 1.000 | NA | NA | NA | NA | NA | NA |
| NM_001303484 | SLC25A18 | ND     | ND    | ND     | ND    | NA | NA | NA | NA | NA | NA |
| NM_000387    | SLC25A20 | 0.164  | 0.819 | 0.319  | 1.000 | NA | NA | NA | NA | NA | NA |
| NM_001191061 | SLC25A22 | 1.544  | 0.000 | 0.456  | 1.000 | NA | NA | NA | NA | NA | NA |
| NM_001039355 | SLC25A29 | 0.628  | 0.195 | 0.322  | 1.000 | NA | NA | NA | NA | NA | NA |
| NM_178526    | SLC25A42 | 0.985  | 0.114 | -0.403 | 1.000 | NA | NA | NA | NA | NA | NA |

|     |              |         |        |       |        |       |        |       |        |       |    |    |
|-----|--------------|---------|--------|-------|--------|-------|--------|-------|--------|-------|----|----|
|     | NM_198580    | SLC27A1 | 1.759  | 0.002 | 0.151  | 1.000 | NA     | NA    | NA     | NA    | NA | NA |
|     | NM_003850    | SUCLA2  | -0.534 | 0.152 | 0.199  | 1.000 | NA     | NA    | NA     | NA    | NA | NA |
|     | NM_003849    | SUCLG1  | -0.202 | 0.658 | 0.115  | 1.000 | NA     | NA    | NA     | NA    | NA | NA |
|     | NM_001177599 | SUCLG2  | -0.586 | 0.268 | 0.366  | 1.000 | NA     | NA    | NA     | NA    | NA | NA |
|     | NM_003355    | UCP2    | 0.506  | 0.413 | -0.048 | 1.000 | NA     | NA    | NA     | NA    | NA | NA |
| G25 | NM_001098    | ACO2    | 0.080  | 0.918 | -0.147 | 0.811 | -0.069 | 0.938 | 0.557  | 0.036 | NA | NA |
|     | NM_004077    | CS      | 0.040  | 0.954 | -0.014 | 1.000 | 0.031  | 0.987 | 0.238  | 0.436 | NA | NA |
|     | NM_000143    | FH      | -0.270 | 0.483 | 0.019  | 1.000 | -0.368 | 0.374 | 0.149  | 0.671 | NA | NA |
|     | NM_012084    | GLUD2   | 0.492  | 0.184 | 0.283  | 0.541 | 0.654  | 0.022 | 0.173  | 0.630 | NA | NA |
|     | NM_002080    | GOT2    | -0.480 | 0.154 | 0.075  | 0.923 | 0.012  | 1.000 | 0.134  | 0.702 | NA | NA |
|     | NM_002168    | IDH2    | -0.374 | 0.362 | 0.392  | 0.395 | -0.118 | 0.858 | 0.110  | 0.780 | NA | NA |
|     | NM_005530    | IDH3A   | 1.019  | 0.006 | 0.435  | 0.316 | -0.242 | 0.613 | -0.436 | 0.149 | NA | NA |
|     | NM_174855    | IDH3B   | 0.766  | 0.006 | 0.757  | 0.010 | 0.040  | 0.976 | 0.405  | 0.139 | NA | NA |
|     | NM_174869    | IDH3G   | 1.025  | 0.001 | 0.140  | 0.782 | 0.032  | 0.986 | 0.812  | 0.001 | NA | NA |
|     | NM_001282404 | MDH2    | 1.215  | 0.000 | 0.366  | 0.383 | 0.163  | 0.767 | -0.469 | 0.093 | NA | NA |
|     | NM_016098    | MPC1    | 2.496  | 0.000 | 1.388  | 0.000 | 0.796  | 0.011 | 0.120  | 0.772 | NA | NA |
|     | NM_001143674 | MPC2    | 0.941  | 0.018 | 0.705  | 0.064 | -0.090 | 0.906 | -0.221 | 0.489 | NA | NA |
|     | NM_001165036 | OGDH    | -0.065 | 0.899 | 0.170  | 0.819 | 0.293  | 0.687 | 0.673  | 0.015 | NA | NA |
|     | NM_000920    | PC      | -0.343 | 0.338 | -0.106 | 0.873 | -0.191 | 0.708 | -0.323 | 0.293 | NA | NA |
|     | NM_004563    | PCK2    | -0.306 | 0.370 | 0.222  | 0.629 | -0.232 | 0.625 | 0.289  | 0.335 | NA | NA |
|     | NM_001173456 | PDHA1   | -0.273 | 0.649 | -0.140 | 0.894 | -0.224 | 0.677 | -0.593 | 0.056 | NA | NA |
|     | NM_001173468 | PDHB    | 0.104  | 0.869 | -0.039 | 0.983 | -0.628 | 0.073 | 0.324  | 0.297 | NA | NA |
|     | NM_003477    | PDHX    | 0.062  | 0.932 | 0.522  | 0.218 | 0.079  | 0.932 | 0.389  | 0.198 | NA | NA |
|     | NM_002610    | PDK1    | ND     | ND    | ND     | ND    | ND     | ND    | 0.242  | 0.661 | NA | NA |
|     | NM_001199898 | PDK2    | 0.370  | 0.681 | -0.265 | 0.749 | -0.034 | 0.989 | 0.170  | 0.631 | NA | NA |
|     | NM_001142386 | PDK3    | 0.859  | 0.013 | 0.525  | 0.136 | -0.150 | 0.823 | -0.429 | 0.136 | NA | NA |
|     | NM_002612    | PDK4    | 0.102  | 0.852 | -0.006 | 1.000 | -0.072 | 0.931 | 1.058  | 0.000 | NA | NA |
|     | NM_001294332 | SDHA    | 0.010  | 1.000 | 0.453  | 0.228 | -0.310 | 0.441 | -0.331 | 0.281 | NA | NA |



|               |              |          |        |       |        |       |        |       |        |       |        |       |
|---------------|--------------|----------|--------|-------|--------|-------|--------|-------|--------|-------|--------|-------|
|               | NM_003000    | SDHB     | -0.518 | 0.174 | -0.284 | 0.577 | -0.174 | 0.761 | 0.148  | 0.670 | NA     | NA    |
|               | NM_003001    | SDHC     | 0.411  | 0.494 | -0.142 | 0.922 | -0.011 | 1.000 | -0.239 | 0.539 | NA     | NA    |
|               | NM_001276503 | SDHD     | 0.818  | 0.124 | 0.231  | 0.710 | 0.265  | 0.589 | -0.425 | 0.217 | NA     | NA    |
|               | NM_005984    | SLC25A1  | -0.264 | 0.423 | -0.595 | 0.061 | 0.022  | 0.995 | -0.033 | 0.942 | NA     | NA    |
|               | NM_012140    | SLC25A10 | -0.050 | 0.926 | 0.352  | 0.320 | -0.194 | 0.689 | 0.893  | 0.000 | NA     | NA    |
|               | NM_001165418 | SLC25A11 | -0.143 | 0.809 | 0.361  | 0.495 | -0.413 | 0.285 | 0.149  | 0.673 | NA     | NA    |
|               | NM_003705    | SLC25A12 | -0.283 | 0.406 | 0.328  | 0.384 | -0.219 | 0.640 | 0.523  | 0.050 | NA     | NA    |
|               | NM_001160210 | SLC25A13 | ND     | ND    | ND     | ND    | 0.210  | 0.902 | -0.799 | 0.337 | NA     | NA    |
|               | NM_014252    | SLC25A15 | -0.094 | 0.827 | 0.392  | 0.279 | -0.105 | 0.844 | -0.170 | 0.603 | NA     | NA    |
|               | NM_001303484 | SLC25A18 | 2.211  | 0.000 | 0.622  | 0.077 | -0.121 | 0.849 | 1.512  | 0.000 | NA     | NA    |
|               | NM_000387    | SLC25A20 | 0.014  | 1.000 | -0.593 | 0.390 | 0.671  | 0.213 | -0.050 | 0.948 | NA     | NA    |
|               | NM_001191061 | SLC25A22 | -0.006 | 1.000 | 0.654  | 0.100 | 0.631  | 0.076 | -0.580 | 0.034 | NA     | NA    |
|               | NM_001039355 | SLC25A29 | 1.728  | 0.002 | 0.479  | 0.358 | 0.704  | 0.044 | 0.070  | 0.881 | NA     | NA    |
|               | NM_178526    | SLC25A42 | -0.149 | 0.795 | 0.688  | 0.110 | 0.026  | 0.995 | 1.288  | 0.000 | NA     | NA    |
|               | NM_198580    | SLC27A1  | -0.128 | 0.780 | 0.195  | 0.702 | 0.350  | 0.357 | 0.196  | 0.543 | NA     | NA    |
|               | NM_003850    | SUCLA2   | 0.405  | 0.259 | 0.365  | 0.371 | -0.206 | 0.677 | 0.519  | 0.059 | NA     | NA    |
|               | NM_003849    | SUCLG1   | -0.243 | 0.615 | -0.193 | 0.766 | -0.212 | 0.675 | -0.124 | 0.744 | NA     | NA    |
|               | NM_001177599 | SUCLG2   | -0.316 | 0.412 | 0.333  | 0.449 | -0.125 | 0.843 | 0.369  | 0.221 | NA     | NA    |
|               | NM_003355    | UCP2     | 1.016  | 0.025 | 0.950  | 0.012 | -0.534 | 0.179 | -0.823 | 0.017 | NA     | NA    |
| G25+Olea+Palm | NM_001098    | ACO2     | NA     | NA    | NA     | NA    | 0.019  | 0.995 | NA     | NA    | -0.187 | 0.895 |
|               | NM_004077    | CS       | NA     | NA    | NA     | NA    | 0.011  | 1.000 | NA     | NA    | -0.389 | 0.465 |
|               | NM_000143    | FH       | NA     | NA    | NA     | NA    | 0.048  | 0.965 | NA     | NA    | -0.168 | 0.921 |
|               | NM_012084    | GLUD2    | NA     | NA    | NA     | NA    | -0.821 | 0.553 | NA     | NA    | 1.161  | 0.292 |
|               | NM_002080    | GOT2     | NA     | NA    | NA     | NA    | 0.267  | 0.545 | NA     | NA    | -0.086 | 0.997 |
|               | NM_002168    | IDH2     | NA     | NA    | NA     | NA    | 0.126  | 0.831 | NA     | NA    | -0.133 | 0.963 |
|               | NM_005530    | IDH3A    | NA     | NA    | NA     | NA    | 0.426  | 0.227 | NA     | NA    | 0.004  | 1.000 |
|               | NM_174855    | IDH3B    | NA     | NA    | NA     | NA    | 0.154  | 0.800 | NA     | NA    | -0.279 | 0.730 |
|               | NM_174869    | IDH3G    | NA     | NA    | NA     | NA    | -0.154 | 0.800 | NA     | NA    | -0.055 | 1.000 |

|              |          |    |    |    |    |        |       |    |    |        |       |
|--------------|----------|----|----|----|----|--------|-------|----|----|--------|-------|
| NM_001282404 | MDH2     | NA | NA | NA | NA | -0.017 | 0.996 | NA | NA | -0.084 | 0.997 |
| NM_016098    | MPC1     | NA | NA | NA | NA | -0.265 | 0.577 | NA | NA | -0.120 | 0.977 |
| NM_001143674 | MPC2     | NA | NA | NA | NA | -0.278 | 0.517 | NA | NA | 0.172  | 0.899 |
| NM_001165036 | OGDH     | NA | NA | NA | NA | 0.166  | 0.770 | NA | NA | 0.052  | 1.000 |
| NM_000920    | PC       | NA | NA | NA | NA | 0.045  | 0.974 | NA | NA | -0.132 | 0.984 |
| NM_004563    | PCK2     | NA | NA | NA | NA | -0.101 | 0.903 | NA | NA | 0.078  | 1.000 |
| NM_001173456 | PDHA1    | NA | NA | NA | NA | 0.032  | 0.980 | NA | NA | 0.021  | 1.000 |
| NM_001173468 | PDHB     | NA | NA | NA | NA | 0.014  | 1.000 | NA | NA | -0.148 | 0.931 |
| NM_003477    | PDHX     | NA | NA | NA | NA | -0.262 | 0.581 | NA | NA | 0.044  | 1.000 |
| NM_002610    | PDK1     | NA | NA | NA | NA | -0.779 | 0.006 | NA | NA | 0.499  | 0.240 |
| NM_001199898 | PDK2     | NA | NA | NA | NA | -0.076 | 0.935 | NA | NA | -0.338 | 0.649 |
| NM_001142386 | PDK3     | NA | NA | NA | NA | -0.326 | 0.411 | NA | NA | 0.234  | 0.784 |
| NM_002612    | PDK4     | NA | NA | NA | NA | 0.453  | 0.166 | NA | NA | 0.992  | 0.000 |
| NM_001294332 | SDHA     | NA | NA | NA | NA | 0.226  | 0.638 | NA | NA | -0.043 | 1.000 |
| NM_003000    | SDHB     | NA | NA | NA | NA | -0.011 | 1.000 | NA | NA | -0.131 | 0.963 |
| NM_003001    | SDHC     | NA | NA | NA | NA | -0.013 | 1.000 | NA | NA | -0.153 | 0.932 |
| NM_001276503 | SDHD     | NA | NA | NA | NA | -0.060 | 0.946 | NA | NA | 0.082  | 1.000 |
| NM_005984    | SLC25A1  | NA | NA | NA | NA | 0.113  | 0.860 | NA | NA | 0.616  | 0.071 |
| NM_012140    | SLC25A10 | NA | NA | NA | NA | 0.554  | 0.136 | NA | NA | 0.203  | 0.889 |
| NM_001165418 | SLC25A11 | NA | NA | NA | NA | 0.084  | 0.910 | NA | NA | 0.013  | 1.000 |
| NM_003705    | SLC25A12 | NA | NA | NA | NA | -0.534 | 0.158 | NA | NA | 0.069  | 1.000 |
| NM_001160210 | SLC25A13 | NA | NA | NA | NA | 0.325  | 0.464 | NA | NA | -0.175 | 0.907 |
| NM_014252    | SLC25A15 | NA | NA | NA | NA | 0.568  | 0.340 | NA | NA | 0.593  | 0.582 |
| NM_001303484 | SLC25A18 | NA | NA | NA | NA | ND     | ND    | NA | NA | ND     | ND    |
| NM_000387    | SLC25A20 | NA | NA | NA | NA | 0.598  | 0.090 | NA | NA | 0.570  | 0.140 |
| NM_001191061 | SLC25A22 | NA | NA | NA | NA | -0.209 | 0.682 | NA | NA | 0.323  | 0.614 |
| NM_001039355 | SLC25A29 | NA | NA | NA | NA | -0.205 | 0.755 | NA | NA | 0.728  | 0.061 |
| NM_178526    | SLC25A42 | NA | NA | NA | NA | -0.579 | 0.349 | NA | NA | 0.086  | 1.000 |

|              |              |         |    |    |    |       |        |       |        |        |        |       |
|--------------|--------------|---------|----|----|----|-------|--------|-------|--------|--------|--------|-------|
|              | NM_198580    | SLC27A1 | NA | NA | NA | NA    | 0.625  | 0.098 | NA     | NA     | 0.427  | 0.677 |
|              | NM_003850    | SUCLA2  | NA | NA | NA | NA    | -0.054 | 0.953 | NA     | NA     | -0.030 | 1.000 |
|              | NM_003849    | SUCLG1  | NA | NA | NA | NA    | -0.052 | 0.956 | NA     | NA     | -0.013 | 1.000 |
|              | NM_001177599 | SUCLG2  | NA | NA | NA | NA    | -0.108 | 0.890 | NA     | NA     | -0.281 | 0.766 |
|              | NM_003355    | UCP2    | NA | NA | NA | NA    | -0.047 | 0.968 | NA     | NA     | 0.333  | 0.596 |
| G25+Olea     | NM_001098    | ACO2    | NA | NA | NA | NA    | 0.112  | 0.850 | 0.824  | 0.001  | -0.112 | 0.927 |
|              | NM_004077    | CS      | NA | NA | NA | NA    | -0.019 | 0.998 | -0.078 | 0.819  | -0.241 | 0.713 |
|              | NM_000143    | FH      | NA | NA | NA | NA    | -0.195 | 0.702 | -0.034 | 0.933  | -0.233 | 0.740 |
|              | NM_012084    | GLUD2   | NA | NA | NA | NA    | -0.141 | 0.945 | -0.159 | 0.878  | 0.832  | 0.595 |
|              | NM_002080    | GOT2    | NA | NA | NA | NA    | 0.004  | 1.000 | -0.165 | 0.585  | -0.286 | 0.595 |
|              | NM_002168    | IDH2    | NA | NA | NA | NA    | 0.435  | 0.180 | 0.304  | 0.319  | -0.141 | 0.885 |
|              | NM_005530    | IDH3A   | NA | NA | NA | NA    | 0.218  | 0.630 | 0.156  | 0.619  | 0.010  | 1.000 |
|              | NM_174855    | IDH3B   | NA | NA | NA | NA    | -0.242 | 0.591 | 0.522  | 0.057  | -0.160 | 0.862 |
|              | NM_174869    | IDH3G   | NA | NA | NA | NA    | -0.218 | 0.644 | -0.287 | 0.345  | -0.236 | 0.739 |
|              | NM_001282404 | MDH2    | NA | NA | NA | NA    | 0.056  | 0.942 | 0.511  | 0.043  | -0.256 | 0.645 |
|              | NM_016098    | MPC1    | NA | NA | NA | NA    | -0.440 | 0.212 | 0.446  | 0.102  | -0.157 | 0.866 |
|              | NM_001143674 | MPC2    | NA | NA | NA | NA    | -0.070 | 0.921 | 0.600  | 0.017  | 0.122  | 0.900 |
|              | NM_001165036 | OGDH    | NA | NA | NA | NA    | 0.093  | 0.885 | 0.745  | 0.002  | -0.062 | 0.968 |
|              | NM_000920    | PC      | NA | NA | NA | NA    | -0.059 | 0.954 | -0.863 | 0.001  | -0.631 | 0.138 |
|              | NM_004563    | PCK2    | NA | NA | NA | NA    | -0.183 | 0.748 | 0.065  | 0.862  | -0.059 | 0.978 |
|              | NM_001173456 | PDHA1   | NA | NA | NA | NA    | 0.099  | 0.873 | 1.101  | 0.000  | 0.085  | 0.951 |
|              | NM_001173468 | PDHB    | NA | NA | NA | NA    | -0.114 | 0.843 | 0.101  | 0.769  | -0.086 | 0.946 |
|              | NM_003477    | PDHX    | NA | NA | NA | NA    | -0.206 | 0.675 | -0.434 | 0.116  | -0.049 | 0.983 |
|              | NM_002610    | PDK1    | NA | NA | NA | NA    | -0.281 | 0.484 | -0.237 | 0.503  | 0.504  | 0.172 |
|              | NM_001199898 | PDK2    | NA | NA | NA | NA    | 0.228  | 0.649 | 0.082  | 0.857  | -0.118 | 0.931 |
|              | NM_001142386 | PDK3    | NA | NA | NA | NA    | -0.271 | 0.505 | -0.300 | 0.272  | 0.008  | 1.000 |
|              | NM_002612    | PDK4    | NA | NA | NA | NA    | -0.136 | 0.796 | 0.105  | 0.737  | -0.083 | 0.947 |
| NM_001294332 | SDHA         | NA      | NA | NA | NA | 0.528 | 0.084  | 0.265 | 0.352  | -0.149 | 0.872  |       |

|           |              |           |      |    |    |    |        |        |        |       |        |       |
|-----------|--------------|-----------|------|----|----|----|--------|--------|--------|-------|--------|-------|
|           | NM_003000    | SDHB      | NA   | NA | NA | NA | -0.105 | 0.861  | 0.428  | 0.113 | -0.067 | 0.962 |
|           | NM_003001    | SDHC      | NA   | NA | NA | NA | -0.114 | 0.847  | 0.247  | 0.421 | -0.036 | 0.994 |
|           | NM_001276503 | SDHD      | NA   | NA | NA | NA | -0.033 | 0.980  | 0.340  | 0.238 | 0.181  | 0.815 |
|           | NM_005984    | SLC25A1   | NA   | NA | NA | NA | 0.275  | 0.497  | -0.024 | 0.959 | 0.701  | 0.019 |
|           | NM_012140    | SLC25A10  | NA   | NA | NA | NA | 0.795  | 0.010  | 1.183  | 0.000 | 0.034  | 1.000 |
|           | NM_001165418 | SLC25A11  | NA   | NA | NA | NA | 0.057  | 0.945  | 0.131  | 0.685 | -0.270 | 0.634 |
|           | NM_003705    | SLC25A12  | NA   | NA | NA | NA | -0.453 | 0.235  | 0.164  | 0.614 | 0.006  | 1.000 |
|           | NM_001160210 | SLC25A13  | NA   | NA | NA | NA | 0.325  | 0.422  | 0.177  | 0.585 | -0.420 | 0.296 |
|           | NM_014252    | SLC25A15  | NA   | NA | NA | NA | 0.646  | 0.214  | -0.138 | 0.764 | 0.234  | 0.921 |
|           | NM_001303484 | SLC25A18  | NA   | NA | NA | NA | ND     | ND     | -0.515 | 0.276 | ND     | ND    |
|           | NM_000387    | SLC25A20  | NA   | NA | NA | NA | 0.368  | 0.380  | 1.484  | 0.000 | 0.415  | 0.350 |
|           | NM_001191061 | SLC25A22  | NA   | NA | NA | NA | -0.125 | 0.825  | 1.618  | 0.000 | 0.093  | 0.943 |
|           | NM_001039355 | SLC25A29  | NA   | NA | NA | NA | 0.199  | 0.740  | -0.131 | 0.686 | 0.558  | 0.194 |
|           | NM_178526    | SLC25A42  | NA   | NA | NA | NA | -0.383 | 0.567  | 0.508  | 0.065 | -0.259 | 0.824 |
|           | NM_198580    | SLC27A1   | NA   | NA | NA | NA | 0.724  | 0.031  | 0.386  | 0.193 | 0.450  | 0.536 |
|           | NM_003850    | SUCLA2    | NA   | NA | NA | NA | -0.114 | 0.846  | -0.512 | 0.060 | -0.091 | 0.942 |
|           | NM_003849    | SUCLG1    | NA   | NA | NA | NA | -0.031 | 0.982  | -0.023 | 0.961 | 0.053  | 0.978 |
|           | NM_001177599 | SUCLG2    | NA   | NA | NA | NA | -0.028 | 0.990  | -0.498 | 0.099 | -0.212 | 0.804 |
|           | NM_003355    | UCP2      | NA   | NA | NA | NA | 0.215  | 0.696  | 0.306  | 0.370 | 0.005  | 1.000 |
|           | G25+Patm     | NM_001098 | ACO2 | NA | NA | NA | NA     | -0.138 | 0.778  | NA    | NA     | 0.031 |
| NM_004077 |              | CS        | NA   | NA | NA | NA | 0.055  | 0.935  | NA     | NA    | -0.146 | 0.870 |
| NM_000143 |              | FH        | NA   | NA | NA | NA | -0.211 | 0.631  | NA     | NA    | -0.119 | 0.907 |
| NM_012084 |              | GLUD2     | NA   | NA | NA | NA | 0.210  | 0.902  | NA     | NA    | 0.466  | 0.868 |
| NM_002080 |              | GOT2      | NA   | NA | NA | NA | -0.105 | 0.844  | NA     | NA    | 0.042  | 0.989 |
| NM_002168 |              | IDH2      | NA   | NA | NA | NA | 0.256  | 0.482  | NA     | NA    | -0.320 | 0.524 |
| NM_005530 |              | IDH3A     | NA   | NA | NA | NA | 0.075  | 0.901  | NA     | NA    | 0.011  | 1.000 |
| NM_174855 |              | IDH3B     | NA   | NA | NA | NA | -0.006 | 1.000  | NA     | NA    | -0.412 | 0.324 |
| NM_174869 |              | IDH3G     | NA   | NA | NA | NA | -0.231 | 0.572  | NA     | NA    | 0.017  | 1.000 |

|              |          |    |    |    |    |        |       |    |    |        |       |
|--------------|----------|----|----|----|----|--------|-------|----|----|--------|-------|
| NM_001282404 | MDH2     | NA | NA | NA | NA | -0.117 | 0.816 | NA | NA | -0.201 | 0.758 |
| NM_016098    | MPC1     | NA | NA | NA | NA | -0.111 | 0.841 | NA | NA | 0.439  | 0.270 |
| NM_001143674 | MPC2     | NA | NA | NA | NA | -0.211 | 0.598 | NA | NA | 0.327  | 0.467 |
| NM_001165036 | OGDH     | NA | NA | NA | NA | -0.111 | 0.837 | NA | NA | 0.068  | 0.971 |
| NM_000920    | PC       | NA | NA | NA | NA | -0.268 | 0.532 | NA | NA | -0.216 | 0.806 |
| NM_004563    | PCK2     | NA | NA | NA | NA | -0.228 | 0.616 | NA | NA | -0.051 | 0.990 |
| NM_001173456 | PDHA1    | NA | NA | NA | NA | 0.107  | 0.843 | NA | NA | 0.063  | 0.976 |
| NM_001173468 | PDHB     | NA | NA | NA | NA | -0.292 | 0.406 | NA | NA | -0.121 | 0.893 |
| NM_003477    | PDHX     | NA | NA | NA | NA | -0.215 | 0.616 | NA | NA | -0.086 | 0.952 |
| NM_002610    | PDK1     | NA | NA | NA | NA | 0.143  | 0.761 | NA | NA | 0.014  | 1.000 |
| NM_001199898 | PDK2     | NA | NA | NA | NA | -0.070 | 0.924 | NA | NA | -0.117 | 0.922 |
| NM_001142386 | PDK3     | NA | NA | NA | NA | -0.320 | 0.345 | NA | NA | 0.113  | 0.905 |
| NM_002612    | PDK4     | NA | NA | NA | NA | 0.338  | 0.296 | NA | NA | 1.876  | 0.000 |
| NM_001294332 | SDHA     | NA | NA | NA | NA | 0.241  | 0.525 | NA | NA | -0.084 | 0.952 |
| NM_003000    | SDHB     | NA | NA | NA | NA | -0.084 | 0.886 | NA | NA | 0.032  | 1.000 |
| NM_003001    | SDHC     | NA | NA | NA | NA | -0.365 | 0.277 | NA | NA | -0.257 | 0.660 |
| NM_001276503 | SDHD     | NA | NA | NA | NA | -0.001 | 1.000 | NA | NA | 0.186  | 0.795 |
| NM_005984    | SLC25A1  | NA | NA | NA | NA | 0.094  | 0.864 | NA | NA | 0.468  | 0.215 |
| NM_012140    | SLC25A10 | NA | NA | NA | NA | 0.557  | 0.090 | NA | NA | 0.166  | 0.862 |
| NM_001165418 | SLC25A11 | NA | NA | NA | NA | -0.184 | 0.675 | NA | NA | 0.011  | 1.000 |
| NM_003705    | SLC25A12 | NA | NA | NA | NA | -0.572 | 0.077 | NA | NA | -0.022 | 1.000 |
| NM_001160210 | SLC25A13 | NA | NA | NA | NA | 0.262  | 0.511 | NA | NA | -0.388 | 0.368 |
| NM_014252    | SLC25A15 | NA | NA | NA | NA | 0.814  | 0.048 | NA | NA | 0.857  | 0.154 |
| NM_001303484 | SLC25A18 | NA | NA | NA | NA | ND     | ND    | NA | NA | ND     | ND    |
| NM_000387    | SLC25A20 | NA | NA | NA | NA | 0.547  | 0.090 | NA | NA | 0.503  | 0.196 |
| NM_001191061 | SLC25A22 | NA | NA | NA | NA | -0.337 | 0.323 | NA | NA | 0.320  | 0.516 |
| NM_001039355 | SLC25A29 | NA | NA | NA | NA | 0.185  | 0.727 | NA | NA | 0.773  | 0.030 |
| NM_178526    | SLC25A42 | NA | NA | NA | NA | -0.191 | 0.795 | NA | NA | -0.189 | 0.882 |

|              |         |    |    |    |    |        |       |    |    |        |       |
|--------------|---------|----|----|----|----|--------|-------|----|----|--------|-------|
| NM_198580    | SLC27A1 | NA | NA | NA | NA | 0.376  | 0.354 | NA | NA | 0.457  | 0.507 |
| NM_003850    | SUCLA2  | NA | NA | NA | NA | -0.085 | 0.883 | NA | NA | -0.107 | 0.916 |
| NM_003849    | SUCLG1  | NA | NA | NA | NA | 0.022  | 0.983 | NA | NA | 0.155  | 0.851 |
| NM_001177599 | SUCLG2  | NA | NA | NA | NA | 0.139  | 0.800 | NA | NA | -0.143 | 0.896 |
| NM_003355    | UCP2    | NA | NA | NA | NA | -0.751 | 0.017 | NA | NA | 0.594  | 0.068 |

**Supplementary Table S3.** Quantitative data related to the transcriptomic profiles of the electron transport chain machinery and related mitochondrial carriers in human islets upon metabolic stress. NA: Not applicable (condition not tested); ND: not detected.

|           | Accession<br>(NCBI Ref.<br>Sequence) | Gene<br>symbol | Donor #1            |                   | Donor #2            |                   | Donor #3            |                   | Donor #4            |                   | Donor #5            |                   |
|-----------|--------------------------------------|----------------|---------------------|-------------------|---------------------|-------------------|---------------------|-------------------|---------------------|-------------------|---------------------|-------------------|
|           |                                      |                | Log <sub>2</sub> FC | Adjusted <i>p</i> | Log <sub>2</sub> FC | Adjusted <i>p</i> | Log <sub>2</sub> FC | Adjusted <i>p</i> | Log <sub>2</sub> FC | Adjusted <i>p</i> | Log <sub>2</sub> FC | Adjusted <i>p</i> |
| Olea      | NM_001001937                         | ATP5A1         | -0.242              | 0.489             | 0.037               | 0.972             | NA                  | NA                | -0.265              | 0.491             | NA                  | NA                |
|           | NM_001686                            | ATP5B          | 0.177               | 0.637             | 0.139               | 0.798             | NA                  | NA                | 0.099               | 0.852             | NA                  | NA                |
|           | NM_005174                            | ATP5C1         | -0.089              | 0.860             | 0.270               | 0.560             | NA                  | NA                | -0.252              | 0.544             | NA                  | NA                |
|           | NM_001687                            | ATP5D          | 0.892               | 0.075             | 0.670               | 0.120             | NA                  | NA                | -0.118              | 0.837             | NA                  | NA                |
|           | NM_001688                            | ATP5F1         | -0.331              | 0.371             | -0.088              | 0.899             | NA                  | NA                | -0.239              | 0.575             | NA                  | NA                |
|           | NM_005175                            | ATP5G1         | 0.321               | 0.642             | 0.877               | 0.057             | NA                  | NA                | 0.152               | 0.801             | NA                  | NA                |
|           | NM_001002031                         | ATP5G2         | 0.762               | 0.018             | 0.257               | 0.579             | NA                  | NA                | 0.214               | 0.613             | NA                  | NA                |
|           | NM_001689                            | ATP5G3         | -0.167              | 0.715             | 0.111               | 0.863             | NA                  | NA                | 0.162               | 0.728             | NA                  | NA                |
|           | NM_006356                            | ATP5H          | -0.113              | 0.844             | 0.249               | 0.641             | NA                  | NA                | 0.309               | 0.455             | NA                  | NA                |
|           | NM_007100                            | ATP5I          | 0.167               | 0.847             | 0.489               | 0.345             | NA                  | NA                | 0.400               | 0.402             | NA                  | NA                |
|           | NM_004889                            | ATP5J2         | -0.246              | 0.584             | 0.449               | 0.305             | NA                  | NA                | 0.575               | 0.091             | NA                  | NA                |
|           | NM_006476                            | ATP5L          | -0.219              | 0.573             | 0.053               | 0.948             | NA                  | NA                | -0.010              | 1.000             | NA                  | NA                |
|           | NM_001697                            | ATP5O          | -0.473              | 0.180             | -0.005              | 1.000             | NA                  | NA                | -0.258              | 0.542             | NA                  | NA                |
|           | NM_001003805                         | ATP5S          | -0.142              | 0.924             | -0.043              | 0.992             | NA                  | NA                | -0.292              | 0.575             | NA                  | NA                |
|           | NM_178190                            | ATPIF1         | -0.312              | 0.489             | 0.248               | 0.630             | NA                  | NA                | 0.188               | 0.680             | NA                  | NA                |
|           | NM_001162862                         | COX11          | -0.600              | 0.302             | -0.393              | 0.538             | NA                  | NA                | -0.285              | 0.498             | NA                  | NA                |
|           | NM_078470                            | COX15          | 0.016               | 1.000             | -0.393              | 0.387             | NA                  | NA                | -0.042              | 0.958             | NA                  | NA                |
|           | NM_005694                            | COX17          | -0.091              | 0.919             | 0.347               | 0.495             | NA                  | NA                | 0.083               | 0.899             | NA                  | NA                |
|           | NM_001861                            | COX4I1         | -0.272              | 0.447             | 0.374               | 0.360             | NA                  | NA                | 0.270               | 0.484             | NA                  | NA                |
|           | NM_004255                            | COX5A          | 0.183               | 0.747             | -0.006              | 1.000             | NA                  | NA                | -0.128              | 0.819             | NA                  | NA                |
| NM_001862 | COX5B                                | 1.358          | 0.000               | 0.792             | 0.038               | NA                | NA                  | 0.277             | 0.495               | NA                | NA                  |                   |
| NM_004373 | COX6A1                               | 0.274          | 0.627               | 0.369             | 0.465               | NA                | NA                  | 0.027             | 0.983               | NA                | NA                  |                   |

|              |         |        |       |        |       |    |    |        |       |    |    |
|--------------|---------|--------|-------|--------|-------|----|----|--------|-------|----|----|
| NM_001863    | COX6B1  | -0.074 | 0.910 | 0.479  | 0.244 | NA | NA | 0.035  | 0.971 | NA | NA |
| NM_004374    | COX6C   | -0.431 | 0.246 | 0.207  | 0.692 | NA | NA | 0.132  | 0.806 | NA | NA |
| NM_001864    | COX7A1  | 0.668  | 0.638 | -0.131 | 0.935 | NA | NA | 0.171  | 0.815 | NA | NA |
| NM_001865    | COX7A2  | -0.541 | 0.107 | 0.408  | 0.341 | NA | NA | 0.098  | 0.862 | NA | NA |
| NM_004718    | COX7A2L | -0.176 | 0.666 | 0.085  | 0.899 | NA | NA | -0.016 | 0.997 | NA | NA |
| NM_001866    | COX7B   | -0.555 | 0.122 | 0.255  | 0.617 | NA | NA | 0.343  | 0.389 | NA | NA |
| NM_001867    | COX7C   | -0.120 | 0.796 | 0.336  | 0.447 | NA | NA | 0.145  | 0.761 | NA | NA |
| NM_004074    | COX8A   | 1.761  | 0.000 | 0.571  | 0.129 | NA | NA | 0.274  | 0.477 | NA | NA |
| NM_004541    | NDUFA1  | -0.047 | 0.982 | 0.587  | 0.158 | NA | NA | 0.090  | 0.883 | NA | NA |
| NM_004544    | NDUFA10 | 0.139  | 0.782 | 0.204  | 0.692 | NA | NA | -0.142 | 0.777 | NA | NA |
| NM_001258338 | NDUFA12 | -0.268 | 0.571 | 0.301  | 0.557 | NA | NA | -0.170 | 0.733 | NA | NA |
| NM_002488    | NDUFA2  | 0.151  | 0.809 | 0.691  | 0.119 | NA | NA | 0.163  | 0.748 | NA | NA |
| NM_004542    | NDUFA3  | 0.971  | 0.092 | 0.390  | 0.459 | NA | NA | -0.067 | 0.940 | NA | NA |
| NM_002489    | NDUFA4  | -0.481 | 0.253 | 0.229  | 0.703 | NA | NA | 0.391  | 0.309 | NA | NA |
| NM_001291304 | NDUFA5  | -0.816 | 0.005 | 0.117  | 0.856 | NA | NA | -0.375 | 0.300 | NA | NA |
| NM_002490    | NDUFA6  | -0.119 | 0.808 | 0.435  | 0.328 | NA | NA | 0.032  | 0.976 | NA | NA |
| NM_005001    | NDUFA7  | 0.834  | 0.140 | 0.578  | 0.180 | NA | NA | 0.259  | 0.597 | NA | NA |
| NM_014222    | NDUFA8  | -0.323 | 0.518 | 0.378  | 0.439 | NA | NA | 0.102  | 0.865 | NA | NA |
| NM_005002    | NDUFA9  | -0.232 | 0.594 | 0.406  | 0.371 | NA | NA | -0.242 | 0.578 | NA | NA |
| NM_005003    | NDUFAB1 | -0.395 | 0.374 | 0.550  | 0.203 | NA | NA | 0.156  | 0.761 | NA | NA |
| NM_004545    | NDUFB1  | -0.503 | 0.303 | 0.107  | 0.902 | NA | NA | 0.258  | 0.658 | NA | NA |
| NM_004548    | NDUFB10 | 0.496  | 0.258 | 0.580  | 0.165 | NA | NA | -0.023 | 0.990 | NA | NA |
| NM_004546    | NDUFB2  | 0.467  | 0.301 | 0.515  | 0.245 | NA | NA | 0.196  | 0.678 | NA | NA |
| NM_002491    | NDUFB3  | -0.545 | 0.204 | -0.177 | 0.792 | NA | NA | -0.057 | 0.956 | NA | NA |
| NM_004547    | NDUFB4  | 0.311  | 0.426 | 0.284  | 0.542 | NA | NA | -0.002 | 1.000 | NA | NA |
| NM_001199958 | NDUFB5  | -0.497 | 0.145 | 0.601  | 0.131 | NA | NA | -0.063 | 0.927 | NA | NA |
| NM_002493    | NDUFB6  | 0.372  | 0.429 | 0.488  | 0.279 | NA | NA | -0.025 | 0.992 | NA | NA |
| NM_004146    | NDUFB7  | 1.200  | 0.002 | 0.535  | 0.191 | NA | NA | 0.347  | 0.352 | NA | NA |



|              |          |        |       |        |       |    |    |        |       |    |    |
|--------------|----------|--------|-------|--------|-------|----|----|--------|-------|----|----|
| NM_005004    | NDUFB8   | 0.140  | 0.792 | 0.452  | 0.288 | NA | NA | -0.059 | 0.929 | NA | NA |
| NM_005005    | NDUFB9   | -0.061 | 0.927 | 0.309  | 0.506 | NA | NA | -0.071 | 0.913 | NA | NA |
| NM_001184990 | NDUFC1   | 0.475  | 0.321 | 0.476  | 0.314 | NA | NA | 0.109  | 0.870 | NA | NA |
| NM_001204055 | NDUFC2   | -0.754 | 0.026 | -0.058 | 0.949 | NA | NA | 0.196  | 0.685 | NA | NA |
| NM_001199981 | NDUFS1   | -0.299 | 0.436 | -0.233 | 0.653 | NA | NA | -0.395 | 0.257 | NA | NA |
| NM_004550    | NDUFS2   | -0.024 | 1.000 | 0.030  | 0.993 | NA | NA | 0.098  | 0.862 | NA | NA |
| NM_004551    | NDUFS3   | -0.038 | 0.996 | 0.137  | 0.836 | NA | NA | -0.029 | 0.987 | NA | NA |
| NM_002495    | NDUFS4   | -0.295 | 0.570 | 0.187  | 0.782 | NA | NA | -0.190 | 0.724 | NA | NA |
| NM_004552    | NDUFS5   | -0.540 | 0.099 | 0.283  | 0.541 | NA | NA | 0.165  | 0.743 | NA | NA |
| NM_004553    | NDUFS6   | 0.599  | 0.196 | 0.447  | 0.348 | NA | NA | -0.244 | 0.569 | NA | NA |
| NM_024407    | NDUFS7   | 1.302  | 0.003 | 0.941  | 0.021 | NA | NA | 0.271  | 0.509 | NA | NA |
| NM_002496    | NDUFS8   | 1.240  | 0.002 | 0.546  | 0.206 | NA | NA | 0.205  | 0.660 | NA | NA |
| NM_001166102 | NDUFV1   | 0.441  | 0.262 | 0.633  | 0.105 | NA | NA | 0.082  | 0.889 | NA | NA |
| NM_021074    | NDUFV2   | -0.300 | 0.485 | 0.064  | 0.941 | NA | NA | 0.051  | 0.947 | NA | NA |
| NM_021075    | NDUFV3   | 0.571  | 0.197 | 0.084  | 0.936 | NA | NA | 0.089  | 0.892 | NA | NA |
| NM_004589    | SCO1     | 0.285  | 0.589 | 0.117  | 0.876 | NA | NA | -0.001 | 1.000 | NA | NA |
| NM_001294332 | SDHA     | -0.219 | 0.627 | 0.026  | 0.995 | NA | NA | -0.189 | 0.679 | NA | NA |
| NM_003000    | SDHB     | 0.140  | 0.801 | 0.444  | 0.308 | NA | NA | 0.011  | 1.000 | NA | NA |
| NM_003001    | SDHC     | -0.148 | 0.795 | -0.231 | 0.704 | NA | NA | 0.267  | 0.538 | NA | NA |
| NM_001276503 | SDHD     | -0.169 | 0.728 | 0.165  | 0.793 | NA | NA | -0.190 | 0.697 | NA | NA |
| NM_001282198 | SLC25A14 | -0.783 | 0.090 | 0.136  | 0.875 | NA | NA | -0.031 | 0.986 | NA | NA |
| NM_001204052 | SLC25A27 | -0.610 | 0.137 | -0.418 | 0.483 | NA | NA | 0.348  | 0.400 | NA | NA |
| NM_002635    | SLC25A3  | -0.153 | 0.700 | 0.042  | 0.966 | NA | NA | -0.099 | 0.854 | NA | NA |
| NM_001151    | SLC25A4  | -0.020 | 1.000 | 0.233  | 0.642 | NA | NA | -0.107 | 0.842 | NA | NA |
| NM_001152    | SLC25A5  | -0.294 | 0.403 | 0.225  | 0.639 | NA | NA | -0.232 | 0.567 | NA | NA |
| NM_003172    | SURF1    | -0.212 | 0.731 | 0.361  | 0.491 | NA | NA | 0.221  | 0.618 | NA | NA |
| NM_003355    | UCP2     | 0.167  | 0.829 | 0.252  | 0.685 | NA | NA | 0.257  | 0.619 | NA | NA |
| NM_013387    | UQCR10   | 0.601  | 0.102 | 0.391  | 0.382 | NA | NA | 0.287  | 0.480 | NA | NA |

|           |              |         |        |        |        |       |    |    |        |       |    |    |
|-----------|--------------|---------|--------|--------|--------|-------|----|----|--------|-------|----|----|
|           | NM_006830    | UQCR11  | 0.875  | 0.013  | 0.476  | 0.248 | NA | NA | 0.191  | 0.672 | NA | NA |
|           | NM_006294    | UQCRB   | -0.519 | 0.102  | 0.090  | 0.891 | NA | NA | -0.326 | 0.383 | NA | NA |
|           | NM_003365    | UQCRC1  | 0.443  | 0.232  | 0.284  | 0.545 | NA | NA | 0.090  | 0.878 | NA | NA |
|           | NM_003366    | UQCRC2  | -0.387 | 0.271  | 0.151  | 0.792 | NA | NA | -0.448 | 0.184 | NA | NA |
|           | NM_006003    | UQCRFS1 | -0.488 | 0.194  | 0.183  | 0.751 | NA | NA | -0.034 | 0.972 | NA | NA |
|           | NM_001297566 | UQCRH   | 0.177  | 0.729  | 0.177  | 0.762 | NA | NA | -0.082 | 0.900 | NA | NA |
|           | NM_014402    | UQCRQ   | -0.116 | 0.806  | 0.287  | 0.534 | NA | NA | 0.123  | 0.819 | NA | NA |
| Palm      | NM_001001937 | ATP5A1  | -0.088 | 0.870  | 0.006  | 1.000 | NA | NA | NA     | NA    | NA | NA |
|           | NM_001686    | ATP5B   | 0.272  | 0.449  | 0.039  | 1.000 | NA | NA | NA     | NA    | NA | NA |
|           | NM_005174    | ATP5C1  | 0.254  | 0.522  | -0.015 | 1.000 | NA | NA | NA     | NA    | NA | NA |
|           | NM_001687    | ATP5D   | 1.104  | 0.018  | 0.512  | 1.000 | NA | NA | NA     | NA    | NA | NA |
|           | NM_001688    | ATP5F1  | 0.095  | 0.880  | -0.010 | 1.000 | NA | NA | NA     | NA    | NA | NA |
|           | NM_005175    | ATP5G1  | 1.028  | 0.028  | 0.579  | 1.000 | NA | NA | NA     | NA    | NA | NA |
|           | NM_001002031 | ATP5G2  | 0.850  | 0.009  | 0.196  | 1.000 | NA | NA | NA     | NA    | NA | NA |
|           | NM_001689    | ATP5G3  | 0.357  | 0.359  | 0.030  | 1.000 | NA | NA | NA     | NA    | NA | NA |
|           | NM_006356    | ATP5H   | 0.568  | 0.135  | 0.123  | 1.000 | NA | NA | NA     | NA    | NA | NA |
|           | NM_007100    | ATP5I   | 0.094  | 0.973  | 0.681  | 0.900 | NA | NA | NA     | NA    | NA | NA |
|           | NM_004889    | ATP5J2  | 0.016  | 1.000  | 0.194  | 1.000 | NA | NA | NA     | NA    | NA | NA |
|           | NM_006476    | ATP5L   | 0.128  | 0.797  | -0.029 | 1.000 | NA | NA | NA     | NA    | NA | NA |
|           | NM_001697    | ATP5O   | 0.053  | 0.956  | -0.196 | 1.000 | NA | NA | NA     | NA    | NA | NA |
|           | NM_001003805 | ATP5S   | -0.402 | 0.557  | -0.348 | 1.000 | NA | NA | NA     | NA    | NA | NA |
|           | NM_178190    | ATPIF1  | 0.355  | 0.424  | -0.127 | 1.000 | NA | NA | NA     | NA    | NA | NA |
|           | NM_001162862 | COX11   | 0.063  | 0.983  | 0.242  | 1.000 | NA | NA | NA     | NA    | NA | NA |
|           | NM_078470    | COX15   | 0.226  | 0.628  | -0.275 | 1.000 | NA | NA | NA     | NA    | NA | NA |
|           | NM_005694    | COX17   | 0.279  | 0.617  | 0.214  | 1.000 | NA | NA | NA     | NA    | NA | NA |
|           | NM_001861    | COX4I1  | -0.127 | 0.799  | 0.067  | 1.000 | NA | NA | NA     | NA    | NA | NA |
| NM_004255 | COX5A        | -0.038  | 0.999  | -0.067 | 1.000  | NA    | NA | NA | NA     | NA    | NA |    |
| NM_001862 | COX5B        | 1.481   | 0.000  | 0.654  | 0.751  | NA    | NA | NA | NA     | NA    | NA |    |

|              |         |        |       |        |       |    |    |    |    |    |    |
|--------------|---------|--------|-------|--------|-------|----|----|----|----|----|----|
| NM_004373    | COX6A1  | 0.589  | 0.194 | 0.412  | 1.000 | NA | NA | NA | NA | NA | NA |
| NM_001863    | COX6B1  | 0.177  | 0.724 | 0.326  | 1.000 | NA | NA | NA | NA | NA | NA |
| NM_004374    | COX6C   | 0.169  | 0.734 | -0.135 | 1.000 | NA | NA | NA | NA | NA | NA |
| NM_001864    | COX7A1  | 0.141  | 1.000 | -0.217 | 1.000 | NA | NA | NA | NA | NA | NA |
| NM_001865    | COX7A2  | -0.083 | 0.897 | 0.401  | 1.000 | NA | NA | NA | NA | NA | NA |
| NM_004718    | COX7A2L | 0.118  | 0.819 | -0.005 | 1.000 | NA | NA | NA | NA | NA | NA |
| NM_001866    | COX7B   | -0.242 | 0.603 | 0.017  | 1.000 | NA | NA | NA | NA | NA | NA |
| NM_001867    | COX7C   | 0.307  | 0.418 | 0.138  | 1.000 | NA | NA | NA | NA | NA | NA |
| NM_004074    | COX8A   | 1.786  | 0.000 | 0.230  | 1.000 | NA | NA | NA | NA | NA | NA |
| NM_004541    | NDUFA1  | 0.129  | 0.861 | 0.628  | 0.790 | NA | NA | NA | NA | NA | NA |
| NM_004544    | NDUFA10 | 0.359  | 0.363 | 0.063  | 1.000 | NA | NA | NA | NA | NA | NA |
| NM_001258338 | NDUFA12 | 0.208  | 0.699 | 0.126  | 1.000 | NA | NA | NA | NA | NA | NA |
| NM_002488    | NDUFA2  | -0.053 | 0.972 | 0.298  | 1.000 | NA | NA | NA | NA | NA | NA |
| NM_004542    | NDUFA3  | 0.364  | 0.756 | 0.229  | 1.000 | NA | NA | NA | NA | NA | NA |
| NM_002489    | NDUFA4  | 0.014  | 1.000 | -0.547 | 1.000 | NA | NA | NA | NA | NA | NA |
| NM_001291304 | NDUFA5  | -0.067 | 0.928 | 0.112  | 1.000 | NA | NA | NA | NA | NA | NA |
| NM_002490    | NDUFA6  | 0.292  | 0.482 | 0.221  | 1.000 | NA | NA | NA | NA | NA | NA |
| NM_005001    | NDUFA7  | 1.487  | 0.001 | 0.255  | 1.000 | NA | NA | NA | NA | NA | NA |
| NM_014222    | NDUFA8  | 0.218  | 0.705 | 0.411  | 1.000 | NA | NA | NA | NA | NA | NA |
| NM_005002    | NDUFA9  | -0.054 | 0.955 | -0.120 | 1.000 | NA | NA | NA | NA | NA | NA |
| NM_005003    | NDUFAB1 | 0.157  | 0.806 | 0.366  | 1.000 | NA | NA | NA | NA | NA | NA |
| NM_004545    | NDUFB1  | 0.090  | 0.944 | 0.283  | 1.000 | NA | NA | NA | NA | NA | NA |
| NM_004548    | NDUFB10 | 0.585  | 0.166 | 0.273  | 1.000 | NA | NA | NA | NA | NA | NA |
| NM_004546    | NDUFB2  | 0.789  | 0.045 | 0.175  | 1.000 | NA | NA | NA | NA | NA | NA |
| NM_002491    | NDUFB3  | -0.477 | 0.302 | -0.071 | 1.000 | NA | NA | NA | NA | NA | NA |
| NM_004547    | NDUFB4  | 0.485  | 0.179 | 0.307  | 1.000 | NA | NA | NA | NA | NA | NA |
| NM_001199958 | NDUFB5  | 0.073  | 0.918 | 0.329  | 1.000 | NA | NA | NA | NA | NA | NA |
| NM_002493    | NDUFB6  | 0.806  | 0.040 | 0.105  | 1.000 | NA | NA | NA | NA | NA | NA |

|              |          |        |       |        |       |    |    |    |    |    |    |
|--------------|----------|--------|-------|--------|-------|----|----|----|----|----|----|
| NM_004146    | NDUFB7   | 1.325  | 0.001 | -0.025 | 1.000 | NA | NA | NA | NA | NA | NA |
| NM_005004    | NDUFB8   | 0.314  | 0.486 | 0.456  | 1.000 | NA | NA | NA | NA | NA | NA |
| NM_005005    | NDUFB9   | 0.153  | 0.768 | 0.404  | 1.000 | NA | NA | NA | NA | NA | NA |
| NM_001184990 | NDUFC1   | 0.378  | 0.497 | 0.209  | 1.000 | NA | NA | NA | NA | NA | NA |
| NM_001204055 | NDUFC2   | -0.089 | 0.900 | -0.241 | 1.000 | NA | NA | NA | NA | NA | NA |
| NM_001199981 | NDUFS1   | -0.075 | 0.923 | 0.172  | 1.000 | NA | NA | NA | NA | NA | NA |
| NM_004550    | NDUFS2   | 0.153  | 0.785 | 0.203  | 1.000 | NA | NA | NA | NA | NA | NA |
| NM_004551    | NDUFS3   | 0.434  | 0.318 | -0.207 | 1.000 | NA | NA | NA | NA | NA | NA |
| NM_002495    | NDUFS4   | -0.066 | 0.967 | 0.045  | 1.000 | NA | NA | NA | NA | NA | NA |
| NM_004552    | NDUFS5   | -0.257 | 0.527 | 0.016  | 1.000 | NA | NA | NA | NA | NA | NA |
| NM_004553    | NDUFS6   | 0.868  | 0.044 | 0.193  | 1.000 | NA | NA | NA | NA | NA | NA |
| NM_024407    | NDUFS7   | 0.922  | 0.074 | 0.484  | 1.000 | NA | NA | NA | NA | NA | NA |
| NM_002496    | NDUFS8   | 1.242  | 0.002 | 0.213  | 1.000 | NA | NA | NA | NA | NA | NA |
| NM_001166102 | NDUFV1   | 0.461  | 0.253 | 0.270  | 1.000 | NA | NA | NA | NA | NA | NA |
| NM_021074    | NDUFV2   | -0.079 | 0.918 | 0.059  | 1.000 | NA | NA | NA | NA | NA | NA |
| NM_021075    | NDUFV3   | 0.433  | 0.398 | 0.078  | 1.000 | NA | NA | NA | NA | NA | NA |
| NM_004589    | SCO1     | 0.390  | 0.435 | -0.071 | 1.000 | NA | NA | NA | NA | NA | NA |
| NM_001294332 | SDHA     | -0.225 | 0.663 | 0.043  | 1.000 | NA | NA | NA | NA | NA | NA |
| NM_003000    | SDHB     | 0.195  | 0.724 | 0.136  | 1.000 | NA | NA | NA | NA | NA | NA |
| NM_003001    | SDHC     | -0.371 | 0.466 | -0.261 | 1.000 | NA | NA | NA | NA | NA | NA |
| NM_001276503 | SDHD     | 0.060  | 0.959 | 0.088  | 1.000 | NA | NA | NA | NA | NA | NA |
| NM_001282198 | SLC25A14 | 0.131  | 0.878 | 0.421  | 1.000 | NA | NA | NA | NA | NA | NA |
| NM_001204052 | SLC25A27 | -0.266 | 0.600 | -0.666 | 1.000 | NA | NA | NA | NA | NA | NA |
| NM_002635    | SLC25A3  | 0.111  | 0.823 | -0.075 | 1.000 | NA | NA | NA | NA | NA | NA |
| NM_001151    | SLC25A4  | 0.292  | 0.481 | 0.085  | 1.000 | NA | NA | NA | NA | NA | NA |
| NM_001152    | SLC25A5  | -0.085 | 0.886 | 0.179  | 1.000 | NA | NA | NA | NA | NA | NA |
| NM_003172    | SURF1    | 0.158  | 0.819 | 0.004  | 1.000 | NA | NA | NA | NA | NA | NA |
| NM_003355    | UCP2     | 0.506  | 0.413 | -0.048 | 1.000 | NA | NA | NA | NA | NA | NA |

|           |              |         |        |       |        |        |        |        |        |       |    |    |
|-----------|--------------|---------|--------|-------|--------|--------|--------|--------|--------|-------|----|----|
|           | NM_013387    | UQCR10  | 0.680  | 0.060 | 0.166  | 1.000  | NA     | NA     | NA     | NA    | NA | NA |
|           | NM_006830    | UQCR11  | 1.069  | 0.002 | 0.150  | 1.000  | NA     | NA     | NA     | NA    | NA | NA |
|           | NM_006294    | UQCRB   | -0.200 | 0.632 | 0.053  | 1.000  | NA     | NA     | NA     | NA    | NA | NA |
|           | NM_003365    | UQCRC1  | 0.675  | 0.047 | 0.190  | 1.000  | NA     | NA     | NA     | NA    | NA | NA |
|           | NM_003366    | UQCRC2  | -0.023 | 1.000 | 0.101  | 1.000  | NA     | NA     | NA     | NA    | NA | NA |
|           | NM_006003    | UQCRFS1 | -0.210 | 0.667 | 0.018  | 1.000  | NA     | NA     | NA     | NA    | NA | NA |
|           | NM_001297566 | UQCRH   | 0.252  | 0.640 | 0.090  | 1.000  | NA     | NA     | NA     | NA    | NA | NA |
|           | NM_014402    | UQCRQ   | 0.510  | 0.127 | 0.101  | 1.000  | NA     | NA     | NA     | NA    | NA | NA |
| G25       | NM_001001937 | ATP5A1  | -0.127 | 0.727 | 0.225  | 0.556  | -0.343 | 0.359  | -0.307 | 0.280 | NA | NA |
|           | NM_001686    | ATP5B   | 0.257  | 0.406 | 0.392  | 0.236  | -0.098 | 0.885  | 0.860  | 0.000 | NA | NA |
|           | NM_005174    | ATP5C1  | 0.039  | 0.950 | 0.400  | 0.258  | -0.160 | 0.768  | -0.096 | 0.796 | NA | NA |
|           | NM_001687    | ATP5D   | 1.330  | 0.002 | 0.909  | 0.013  | -0.088 | 0.909  | 0.011  | 1.000 | NA | NA |
|           | NM_001688    | ATP5F1  | -0.038 | 0.964 | 0.131  | 0.800  | -0.323 | 0.418  | 0.544  | 0.044 | NA | NA |
|           | NM_005175    | ATP5G1  | 1.146  | 0.008 | 1.070  | 0.009  | -0.185 | 0.736  | 1.037  | 0.000 | NA | NA |
|           | NM_001002031 | ATP5G2  | 1.219  | 0.000 | 0.227  | 0.575  | -0.453 | 0.183  | -1.047 | 0.000 | NA | NA |
|           | NM_001689    | ATP5G3  | 0.322  | 0.347 | 0.316  | 0.412  | -0.326 | 0.410  | 0.393  | 0.159 | NA | NA |
|           | NM_006356    | ATP5H   | 0.569  | 0.103 | 0.559  | 0.131  | -0.371 | 0.328  | -0.156 | 0.670 | NA | NA |
|           | NM_007100    | ATP5I   | 0.657  | 0.177 | 0.664  | 0.140  | -0.298 | 0.481  | 0.617  | 0.060 | NA | NA |
|           | NM_004889    | ATP5J2  | 0.042  | 0.971 | 0.786  | 0.018  | -0.250 | 0.577  | 0.854  | 0.001 | NA | NA |
|           | NM_006476    | ATP5L   | 0.044  | 0.940 | 0.297  | 0.428  | -0.499 | 0.120  | -0.396 | 0.156 | NA | NA |
|           | NM_001697    | ATP5O   | -0.322 | 0.356 | 0.177  | 0.714  | -0.013 | 1.000  | -0.024 | 0.969 | NA | NA |
|           | NM_001003805 | ATP5S   | -0.157 | 0.852 | -0.355 | 0.682  | -0.409 | 0.359  | -0.339 | 0.359 | NA | NA |
|           | NM_178190    | ATPIF1  | 0.432  | 0.247 | 0.599  | 0.092  | -0.157 | 0.776  | 0.612  | 0.021 | NA | NA |
|           | NM_001162862 | COX11   | -0.604 | 0.251 | -0.022 | 1.000  | -0.217 | 0.696  | 0.604  | 0.026 | NA | NA |
|           | NM_078470    | COX15   | -0.236 | 0.568 | -0.443 | 0.272  | 0.045  | 0.971  | 0.145  | 0.668 | NA | NA |
|           | NM_005694    | COX17   | 0.560  | 0.163 | 0.549  | 0.164  | -0.368 | 0.327  | -1.080 | 0.000 | NA | NA |
| NM_001861 | COX4I1       | 0.185   | 0.597  | 0.587 | 0.056  | -0.122 | 0.843  | -0.302 | 0.295  | NA    | NA |    |
| NM_004255 | COX5A        | 0.217   | 0.644  | 0.041 | 0.977  | -0.244 | 0.604  | 0.029  | 0.960  | NA    | NA |    |

|              |         |        |       |       |       |        |       |        |       |    |    |
|--------------|---------|--------|-------|-------|-------|--------|-------|--------|-------|----|----|
| NM_001862    | COX5B   | 1.615  | 0.000 | 0.945 | 0.004 | -0.449 | 0.188 | 0.144  | 0.677 | NA | NA |
| NM_004373    | COX6A1  | 0.446  | 0.319 | 0.633 | 0.102 | -0.419 | 0.242 | 0.410  | 0.150 | NA | NA |
| NM_001863    | COX6B1  | 0.275  | 0.450 | 0.842 | 0.007 | -0.415 | 0.253 | -0.033 | 0.948 | NA | NA |
| NM_004374    | COX6C   | -0.102 | 0.835 | 0.471 | 0.190 | -0.683 | 0.017 | -0.919 | 0.001 | NA | NA |
| NM_001864    | COX7A1  | 1.208  | 0.201 | 0.308 | 0.765 | -0.018 | 1.000 | -0.922 | 0.016 | NA | NA |
| NM_001865    | COX7A2  | -0.079 | 0.871 | 0.987 | 0.001 | -0.347 | 0.355 | -0.765 | 0.003 | NA | NA |
| NM_004718    | COX7A2L | 0.097  | 0.816 | 0.148 | 0.745 | -0.061 | 0.943 | 0.469  | 0.080 | NA | NA |
| NM_001866    | COX7B   | -0.076 | 0.882 | 0.425 | 0.276 | -0.600 | 0.050 | -0.551 | 0.064 | NA | NA |
| NM_001867    | COX7C   | 0.231  | 0.507 | 0.527 | 0.110 | -0.563 | 0.070 | -0.251 | 0.406 | NA | NA |
| NM_004074    | COX8A   | 1.755  | 0.000 | 0.663 | 0.033 | -0.605 | 0.043 | -0.116 | 0.737 | NA | NA |
| NM_004541    | NDUFA1  | 0.351  | 0.374 | 1.060 | 0.001 | -0.498 | 0.131 | 0.081  | 0.843 | NA | NA |
| NM_004544    | NDUFA10 | 0.129  | 0.772 | 0.207 | 0.648 | -0.022 | 0.996 | 0.650  | 0.012 | NA | NA |
| NM_001258338 | NDUFA12 | 0.058  | 0.933 | 0.557 | 0.147 | -0.081 | 0.917 | -0.035 | 0.946 | NA | NA |
| NM_002488    | NDUFA2  | 0.290  | 0.570 | 1.013 | 0.006 | -0.368 | 0.344 | 0.228  | 0.486 | NA | NA |
| NM_004542    | NDUFA3  | 1.375  | 0.006 | 0.236 | 0.665 | -0.414 | 0.269 | 0.103  | 0.826 | NA | NA |
| NM_002489    | NDUFA4  | -0.161 | 0.734 | 0.249 | 0.630 | -0.260 | 0.558 | 0.446  | 0.137 | NA | NA |
| NM_001291304 | NDUFA5  | -0.462 | 0.130 | 0.197 | 0.671 | -0.090 | 0.900 | 0.406  | 0.148 | NA | NA |
| NM_002490    | NDUFA6  | 0.029  | 0.975 | 0.417 | 0.297 | 0.020  | 0.998 | 1.198  | 0.000 | NA | NA |
| NM_005001    | NDUFA7  | 1.299  | 0.005 | 0.677 | 0.072 | -0.772 | 0.007 | -0.309 | 0.395 | NA | NA |
| NM_014222    | NDUFA8  | -0.021 | 1.000 | 0.380 | 0.403 | -0.068 | 0.939 | 0.568  | 0.037 | NA | NA |
| NM_005002    | NDUFA9  | -0.378 | 0.293 | 0.204 | 0.687 | -0.158 | 0.774 | 0.431  | 0.130 | NA | NA |
| NM_005003    | NDUFAB1 | -0.143 | 0.809 | 0.712 | 0.051 | -0.235 | 0.611 | 0.315  | 0.300 | NA | NA |
| NM_004545    | NDUFB1  | 0.205  | 0.705 | 0.798 | 0.053 | -0.737 | 0.014 | -0.991 | 0.007 | NA | NA |
| NM_004548    | NDUFB10 | 0.651  | 0.092 | 0.811 | 0.018 | -0.188 | 0.715 | 0.676  | 0.010 | NA | NA |
| NM_004546    | NDUFB2  | 0.907  | 0.011 | 0.811 | 0.022 | -0.377 | 0.303 | -0.231 | 0.490 | NA | NA |
| NM_002491    | NDUFB3  | 0.042  | 0.965 | 0.332 | 0.509 | -0.572 | 0.078 | 0.452  | 0.169 | NA | NA |
| NM_004547    | NDUFB4  | 0.303  | 0.398 | 0.450 | 0.207 | -0.381 | 0.303 | 0.550  | 0.038 | NA | NA |
| NM_001199958 | NDUFB5  | -0.279 | 0.425 | 0.751 | 0.025 | -0.328 | 0.410 | -0.037 | 0.937 | NA | NA |

|              |          |        |       |        |       |        |       |        |       |    |    |
|--------------|----------|--------|-------|--------|-------|--------|-------|--------|-------|----|----|
| NM_002493    | NDUFB6   | 0.572  | 0.146 | 0.482  | 0.256 | -0.341 | 0.381 | 0.354  | 0.252 | NA | NA |
| NM_004146    | NDUFB7   | 1.348  | 0.000 | 0.436  | 0.263 | -0.350 | 0.361 | 0.419  | 0.142 | NA | NA |
| NM_005004    | NDUFB8   | 0.347  | 0.362 | 0.625  | 0.068 | -0.306 | 0.442 | -0.275 | 0.354 | NA | NA |
| NM_005005    | NDUFB9   | 0.268  | 0.453 | 0.642  | 0.048 | -0.321 | 0.418 | 1.132  | 0.000 | NA | NA |
| NM_001184990 | NDUFC1   | 0.341  | 0.476 | 0.387  | 0.409 | -0.235 | 0.612 | 0.305  | 0.366 | NA | NA |
| NM_001204055 | NDUFC2   | -0.279 | 0.453 | 0.287  | 0.514 | -0.189 | 0.714 | -0.375 | 0.230 | NA | NA |
| NM_001199981 | NDUFS1   | -0.232 | 0.536 | -0.407 | 0.310 | -0.216 | 0.656 | 0.172  | 0.599 | NA | NA |
| NM_004550    | NDUFS2   | 0.326  | 0.378 | 0.327  | 0.441 | 0.057  | 0.950 | -0.261 | 0.396 | NA | NA |
| NM_004551    | NDUFS3   | 0.257  | 0.549 | 0.484  | 0.232 | -0.212 | 0.674 | 0.694  | 0.012 | NA | NA |
| NM_002495    | NDUFS4   | -0.130 | 0.831 | 0.653  | 0.113 | -0.241 | 0.616 | 0.468  | 0.123 | NA | NA |
| NM_004552    | NDUFS5   | -0.170 | 0.653 | 0.789  | 0.009 | -0.272 | 0.525 | 0.219  | 0.504 | NA | NA |
| NM_004553    | NDUFS6   | 0.387  | 0.447 | 0.417  | 0.342 | -0.516 | 0.135 | 0.792  | 0.002 | NA | NA |
| NM_024407    | NDUFS7   | 0.540  | 0.370 | 0.798  | 0.052 | -0.365 | 0.353 | 0.912  | 0.000 | NA | NA |
| NM_002496    | NDUFS8   | 1.332  | 0.000 | 0.617  | 0.101 | -0.377 | 0.326 | 0.484  | 0.090 | NA | NA |
| NM_001166102 | NDUFV1   | 0.453  | 0.206 | 0.415  | 0.290 | -0.058 | 0.951 | 0.492  | 0.067 | NA | NA |
| NM_021074    | NDUFV2   | -0.187 | 0.671 | 0.753  | 0.026 | 0.075  | 0.925 | -0.061 | 0.890 | NA | NA |
| NM_021075    | NDUFV3   | 0.362  | 0.435 | 0.095  | 0.927 | -0.187 | 0.739 | 0.936  | 0.000 | NA | NA |
| NM_004589    | SCO1     | 0.271  | 0.589 | -0.010 | 1.000 | -0.070 | 0.943 | 0.642  | 0.022 | NA | NA |
| NM_001294332 | SDHA     | -0.128 | 0.780 | 0.195  | 0.702 | 0.350  | 0.357 | 0.196  | 0.543 | NA | NA |
| NM_003000    | SDHB     | 0.405  | 0.259 | 0.365  | 0.371 | -0.206 | 0.677 | 0.519  | 0.059 | NA | NA |
| NM_003001    | SDHC     | -0.243 | 0.615 | -0.193 | 0.766 | -0.212 | 0.675 | -0.124 | 0.744 | NA | NA |
| NM_001276503 | SDHD     | -0.316 | 0.412 | 0.333  | 0.449 | -0.125 | 0.843 | 0.369  | 0.221 | NA | NA |
| NM_001282198 | SLC25A14 | -0.128 | 0.829 | 0.960  | 0.018 | -0.277 | 0.608 | 0.580  | 0.058 | NA | NA |
| NM_001204052 | SLC25A27 | -0.573 | 0.134 | 0.326  | 0.560 | -0.055 | 0.968 | -0.098 | 0.811 | NA | NA |
| NM_002635    | SLC25A3  | -0.534 | 0.158 | 0.332  | 0.344 | -0.253 | 0.562 | -0.122 | 0.716 | NA | NA |
| NM_001151    | SLC25A4  | 0.198  | 0.607 | 0.506  | 0.149 | 0.017  | 1.000 | 0.354  | 0.207 | NA | NA |
| NM_001152    | SLC25A5  | -0.069 | 0.880 | 0.313  | 0.393 | -0.120 | 0.845 | -0.130 | 0.697 | NA | NA |
| NM_003172    | SURF1    | -0.108 | 0.866 | 0.382  | 0.406 | 0.099  | 0.890 | 0.465  | 0.101 | NA | NA |

|               |              |         |        |       |       |        |        |       |        |        |        |       |
|---------------|--------------|---------|--------|-------|-------|--------|--------|-------|--------|--------|--------|-------|
|               | NM_003355    | UCP2    | 1.016  | 0.025 | 0.950 | 0.012  | -0.534 | 0.179 | -0.823 | 0.017  | NA     | NA    |
|               | NM_013387    | UQCR10  | 0.677  | 0.043 | 0.601 | 0.087  | -0.047 | 0.967 | 0.223  | 0.489  | NA     | NA    |
|               | NM_006830    | UQCR11  | 1.298  | 0.000 | 0.454 | 0.219  | -0.292 | 0.474 | 0.263  | 0.389  | NA     | NA    |
|               | NM_006294    | UQCRB   | -0.241 | 0.469 | 0.317 | 0.385  | -0.510 | 0.116 | 0.498  | 0.064  | NA     | NA    |
|               | NM_003365    | UQCRC1  | 0.652  | 0.041 | 0.440 | 0.223  | 0.092  | 0.896 | 0.529  | 0.046  | NA     | NA    |
|               | NM_003366    | UQCRC2  | -0.122 | 0.774 | 0.123 | 0.821  | -0.102 | 0.885 | -0.115 | 0.745  | NA     | NA    |
|               | NM_006003    | UQCRFS1 | -0.099 | 0.851 | 0.532 | 0.153  | 0.049  | 0.966 | 0.772  | 0.003  | NA     | NA    |
|               | NM_001297566 | UQCRH   | 0.686  | 0.050 | 0.604 | 0.096  | -0.282 | 0.536 | -0.157 | 0.663  | NA     | NA    |
|               | NM_014402    | UQCRQ   | 0.337  | 0.294 | 0.801 | 0.008  | -0.503 | 0.115 | 0.662  | 0.012  | NA     | NA    |
| G25+Olea+Palm | NM_001001937 | ATP5A1  | NA     | NA    | NA    | NA     | -0.206 | 0.669 | NA     | NA     | -0.364 | 0.471 |
|               | NM_001686    | ATP5B   | NA     | NA    | NA    | NA     | 0.041  | 0.966 | NA     | NA     | -0.025 | 1.000 |
|               | NM_005174    | ATP5C1  | NA     | NA    | NA    | NA     | -0.024 | 0.988 | NA     | NA     | -0.219 | 0.823 |
|               | NM_001687    | ATP5D   | NA     | NA    | NA    | NA     | 0.059  | 0.949 | NA     | NA     | -0.222 | 0.842 |
|               | NM_001688    | ATP5F1  | NA     | NA    | NA    | NA     | -0.114 | 0.858 | NA     | NA     | -0.221 | 0.826 |
|               | NM_005175    | ATP5G1  | NA     | NA    | NA    | NA     | 0.138  | 0.822 | NA     | NA     | 0.068  | 1.000 |
|               | NM_001002031 | ATP5G2  | NA     | NA    | NA    | NA     | -0.393 | 0.277 | NA     | NA     | -0.294 | 0.660 |
|               | NM_001689    | ATP5G3  | NA     | NA    | NA    | NA     | -0.062 | 0.943 | NA     | NA     | -0.231 | 0.802 |
|               | NM_006356    | ATP5H   | NA     | NA    | NA    | NA     | -0.176 | 0.747 | NA     | NA     | -0.216 | 0.840 |
|               | NM_007100    | ATP5I   | NA     | NA    | NA    | NA     | -0.149 | 0.805 | NA     | NA     | -0.022 | 1.000 |
|               | NM_004889    | ATP5J2  | NA     | NA    | NA    | NA     | -0.204 | 0.687 | NA     | NA     | -0.023 | 1.000 |
|               | NM_006476    | ATP5L   | NA     | NA    | NA    | NA     | -0.361 | 0.332 | NA     | NA     | -0.142 | 0.941 |
|               | NM_001697    | ATP5O   | NA     | NA    | NA    | NA     | -0.003 | 1.000 | NA     | NA     | -0.021 | 1.000 |
|               | NM_001003805 | ATP5S   | NA     | NA    | NA    | NA     | -0.248 | 0.675 | NA     | NA     | -0.092 | 1.000 |
|               | NM_178190    | ATPIF1  | NA     | NA    | NA    | NA     | -0.141 | 0.811 | NA     | NA     | -0.142 | 0.943 |
|               | NM_001162862 | COX11   | NA     | NA    | NA    | NA     | 0.124  | 0.867 | NA     | NA     | -0.038 | 1.000 |
|               | NM_078470    | COX15   | NA     | NA    | NA    | NA     | 0.060  | 0.946 | NA     | NA     | -0.177 | 0.908 |
| NM_005694     | COX17        | NA      | NA     | NA    | NA    | -0.110 | 0.867  | NA    | NA     | -0.195 | 0.870  |       |
| NM_001861     | COX4I1       | NA      | NA     | NA    | NA    | 0.049  | 0.958  | NA    | NA     | -0.137 | 0.945  |       |



|              |         |    |    |    |    |        |       |    |    |        |       |
|--------------|---------|----|----|----|----|--------|-------|----|----|--------|-------|
| NM_004255    | COX5A   | NA | NA | NA | NA | -0.017 | 1.000 | NA | NA | -0.337 | 0.596 |
| NM_001862    | COX5B   | NA | NA | NA | NA | -0.298 | 0.473 | NA | NA | -0.234 | 0.790 |
| NM_004373    | COX6A1  | NA | NA | NA | NA | -0.177 | 0.744 | NA | NA | -0.257 | 0.754 |
| NM_001863    | COX6B1  | NA | NA | NA | NA | -0.085 | 0.908 | NA | NA | -0.300 | 0.667 |
| NM_004374    | COX6C   | NA | NA | NA | NA | -0.388 | 0.287 | NA | NA | -0.540 | 0.125 |
| NM_001864    | COX7A1  | NA | NA | NA | NA | -0.406 | 0.337 | NA | NA | 0.014  | 1.000 |
| NM_001865    | COX7A2  | NA | NA | NA | NA | -0.194 | 0.701 | NA | NA | -0.120 | 0.968 |
| NM_004718    | COX7A2L | NA | NA | NA | NA | -0.200 | 0.686 | NA | NA | 0.035  | 1.000 |
| NM_001866    | COX7B   | NA | NA | NA | NA | -0.255 | 0.576 | NA | NA | -0.566 | 0.102 |
| NM_001867    | COX7C   | NA | NA | NA | NA | -0.316 | 0.438 | NA | NA | -0.443 | 0.301 |
| NM_004074    | COX8A   | NA | NA | NA | NA | -0.404 | 0.256 | NA | NA | -0.127 | 0.963 |
| NM_004541    | NDUFA1  | NA | NA | NA | NA | -0.198 | 0.700 | NA | NA | -0.271 | 0.719 |
| NM_004544    | NDUFA10 | NA | NA | NA | NA | -0.005 | 1.000 | NA | NA | -0.023 | 1.000 |
| NM_001258338 | NDUFA12 | NA | NA | NA | NA | -0.024 | 0.989 | NA | NA | 0.079  | 1.000 |
| NM_002488    | NDUFA2  | NA | NA | NA | NA | -0.180 | 0.746 | NA | NA | 0.019  | 1.000 |
| NM_004542    | NDUFA3  | NA | NA | NA | NA | -0.209 | 0.687 | NA | NA | -0.212 | 0.849 |
| NM_002489    | NDUFA4  | NA | NA | NA | NA | 0.035  | 0.976 | NA | NA | -0.485 | 0.240 |
| NM_001291304 | NDUFA5  | NA | NA | NA | NA | -0.088 | 0.899 | NA | NA | 0.042  | 1.000 |
| NM_002490    | NDUFA6  | NA | NA | NA | NA | 0.103  | 0.875 | NA | NA | 0.106  | 0.982 |
| NM_005001    | NDUFA7  | NA | NA | NA | NA | -0.507 | 0.132 | NA | NA | -0.320 | 0.606 |
| NM_014222    | NDUFA8  | NA | NA | NA | NA | -0.021 | 0.994 | NA | NA | -0.044 | 1.000 |
| NM_005002    | NDUFA9  | NA | NA | NA | NA | -0.009 | 1.000 | NA | NA | -0.038 | 1.000 |
| NM_005003    | NDUFAB1 | NA | NA | NA | NA | -0.097 | 0.887 | NA | NA | -0.042 | 1.000 |
| NM_004545    | NDUFB1  | NA | NA | NA | NA | -0.397 | 0.309 | NA | NA | -0.537 | 0.149 |
| NM_004548    | NDUFB10 | NA | NA | NA | NA | -0.143 | 0.808 | NA | NA | 0.048  | 1.000 |
| NM_004546    | NDUFB2  | NA | NA | NA | NA | -0.345 | 0.368 | NA | NA | 0.036  | 1.000 |
| NM_002491    | NDUFB3  | NA | NA | NA | NA | -0.273 | 0.555 | NA | NA | -0.513 | 0.183 |
| NM_004547    | NDUFB4  | NA | NA | NA | NA | -0.119 | 0.849 | NA | NA | -0.378 | 0.457 |

|              |          |    |    |    |    |        |       |    |    |        |       |
|--------------|----------|----|----|----|----|--------|-------|----|----|--------|-------|
| NM_001199958 | NDUFB5   | NA | NA | NA | NA | -0.150 | 0.796 | NA | NA | 0.009  | 1.000 |
| NM_002493    | NDUFB6   | NA | NA | NA | NA | -0.062 | 0.942 | NA | NA | -0.279 | 0.700 |
| NM_004146    | NDUFB7   | NA | NA | NA | NA | -0.258 | 0.567 | NA | NA | 0.062  | 1.000 |
| NM_005004    | NDUFB8   | NA | NA | NA | NA | -0.359 | 0.334 | NA | NA | 0.011  | 1.000 |
| NM_005005    | NDUFB9   | NA | NA | NA | NA | -0.245 | 0.595 | NA | NA | -0.069 | 1.000 |
| NM_001184990 | NDUFC1   | NA | NA | NA | NA | -0.138 | 0.818 | NA | NA | -0.301 | 0.649 |
| NM_001204055 | NDUFC2   | NA | NA | NA | NA | -0.143 | 0.809 | NA | NA | -0.066 | 1.000 |
| NM_001199981 | NDUFS1   | NA | NA | NA | NA | 0.096  | 0.890 | NA | NA | 0.003  | 1.000 |
| NM_004550    | NDUFS2   | NA | NA | NA | NA | 0.180  | 0.732 | NA | NA | -0.101 | 0.984 |
| NM_004551    | NDUFS3   | NA | NA | NA | NA | -0.084 | 0.913 | NA | NA | -0.084 | 1.000 |
| NM_002495    | NDUFS4   | NA | NA | NA | NA | -0.241 | 0.625 | NA | NA | -0.120 | 0.974 |
| NM_004552    | NDUFS5   | NA | NA | NA | NA | 0.015  | 1.000 | NA | NA | -0.273 | 0.715 |
| NM_004553    | NDUFS6   | NA | NA | NA | NA | -0.089 | 0.907 | NA | NA | -0.018 | 1.000 |
| NM_024407    | NDUFS7   | NA | NA | NA | NA | -0.232 | 0.642 | NA | NA | 0.079  | 1.000 |
| NM_002496    | NDUFS8   | NA | NA | NA | NA | -0.246 | 0.607 | NA | NA | -0.237 | 0.810 |
| NM_001166102 | NDUFV1   | NA | NA | NA | NA | -0.121 | 0.847 | NA | NA | -0.138 | 0.951 |
| NM_021074    | NDUFV2   | NA | NA | NA | NA | 0.134  | 0.821 | NA | NA | 0.001  | 1.000 |
| NM_021075    | NDUFV3   | NA | NA | NA | NA | -0.092 | 0.903 | NA | NA | -0.010 | 1.000 |
| NM_004589    | SCO1     | NA | NA | NA | NA | 0.276  | 0.573 | NA | NA | -0.003 | 1.000 |
| NM_001294332 | SDHA     | NA | NA | NA | NA | 0.226  | 0.638 | NA | NA | -0.043 | 1.000 |
| NM_003000    | SDHB     | NA | NA | NA | NA | -0.011 | 1.000 | NA | NA | -0.131 | 0.963 |
| NM_003001    | SDHC     | NA | NA | NA | NA | -0.013 | 1.000 | NA | NA | -0.153 | 0.932 |
| NM_001276503 | SDHD     | NA | NA | NA | NA | -0.060 | 0.946 | NA | NA | 0.082  | 1.000 |
| NM_001282198 | SLC25A14 | NA | NA | NA | NA | -0.315 | 0.545 | NA | NA | 0.097  | 0.996 |
| NM_001204052 | SLC25A27 | NA | NA | NA | NA | -0.068 | 0.950 | NA | NA | 0.056  | 1.000 |
| NM_002635    | SLC25A3  | NA | NA | NA | NA | -0.034 | 0.976 | NA | NA | -0.327 | 0.573 |
| NM_001151    | SLC25A4  | NA | NA | NA | NA | -0.201 | 0.687 | NA | NA | 0.082  | 1.000 |
| NM_001152    | SLC25A5  | NA | NA | NA | NA | -0.080 | 0.912 | NA | NA | 0.118  | 0.970 |

|          |              |           |       |    |    |    |        |       |        |       |        |        |
|----------|--------------|-----------|-------|----|----|----|--------|-------|--------|-------|--------|--------|
|          | NM_003172    | SURF1     | NA    | NA | NA | NA | -0.022 | 0.992 | NA     | NA    | 0.203  | 0.868  |
|          | NM_003355    | UCP2      | NA    | NA | NA | NA | -0.047 | 0.968 | NA     | NA    | 0.333  | 0.596  |
|          | NM_013387    | UQCR10    | NA    | NA | NA | NA | -0.002 | 1.000 | NA     | NA    | 0.038  | 1.000  |
|          | NM_006830    | UQCR11    | NA    | NA | NA | NA | -0.117 | 0.849 | NA     | NA    | -0.035 | 1.000  |
|          | NM_006294    | UQCRB     | NA    | NA | NA | NA | -0.290 | 0.494 | NA     | NA    | -0.241 | 0.779  |
|          | NM_003365    | UQCRC1    | NA    | NA | NA | NA | -0.045 | 0.963 | NA     | NA    | 0.012  | 1.000  |
|          | NM_003366    | UQCRC2    | NA    | NA | NA | NA | -0.140 | 0.816 | NA     | NA    | -0.024 | 1.000  |
|          | NM_006003    | UQCRFS1   | NA    | NA | NA | NA | 0.159  | 0.784 | NA     | NA    | -0.047 | 1.000  |
|          | NM_001297566 | UQCRH     | NA    | NA | NA | NA | -0.135 | 0.838 | NA     | NA    | -0.303 | 0.681  |
|          | NM_014402    | UQCRQ     | NA    | NA | NA | NA | -0.307 | 0.446 | NA     | NA    | -0.082 | 0.998  |
| G25+Olea | NM_001001937 | ATP5A1    | NA    | NA | NA | NA | -0.303 | 0.420 | -0.323 | 0.227 | -0.409 | 0.273  |
|          | NM_001686    | ATP5B     | NA    | NA | NA | NA | -0.003 | 1.000 | 0.967  | 0.000 | -0.061 | 0.966  |
|          | NM_005174    | ATP5C1    | NA    | NA | NA | NA | -0.007 | 1.000 | -0.338 | 0.225 | -0.062 | 0.966  |
|          | NM_001687    | ATP5D     | NA    | NA | NA | NA | -0.046 | 0.962 | 0.592  | 0.024 | -0.279 | 0.642  |
|          | NM_001688    | ATP5F1    | NA    | NA | NA | NA | -0.246 | 0.566 | 0.420  | 0.117 | -0.031 | 0.998  |
|          | NM_005175    | ATP5G1    | NA    | NA | NA | NA | -0.100 | 0.878 | 1.073  | 0.000 | 0.024  | 1.000  |
|          | NM_001002031 | ATP5G2    | NA    | NA | NA | NA | -0.487 | 0.124 | -0.709 | 0.005 | -0.257 | 0.649  |
|          | NM_001689    | ATP5G3    | NA    | NA | NA | NA | -0.200 | 0.668 | 0.438  | 0.094 | -0.163 | 0.845  |
|          | NM_006356    | ATP5H     | NA    | NA | NA | NA | -0.326 | 0.394 | 0.221  | 0.482 | -0.247 | 0.684  |
|          | NM_007100    | ATP5I     | NA    | NA | NA | NA | -0.233 | 0.601 | 0.787  | 0.009 | -0.082 | 0.952  |
|          | NM_004889    | ATP5J2    | NA    | NA | NA | NA | -0.193 | 0.685 | 1.213  | 0.000 | -0.107 | 0.926  |
|          | NM_006476    | ATP5L     | NA    | NA | NA | NA | -0.439 | 0.177 | -0.435 | 0.097 | -0.212 | 0.748  |
|          | NM_001697    | ATP5O     | NA    | NA | NA | NA | -0.086 | 0.894 | 0.030  | 0.946 | 0.036  | 0.994  |
|          | NM_001003805 | ATP5S     | NA    | NA | NA | NA | -0.166 | 0.791 | 0.023  | 0.984 | -0.274 | 0.687  |
|          | NM_178190    | ATPIF1    | NA    | NA | NA | NA | -0.070 | 0.923 | 0.894  | 0.000 | -0.079 | 0.953  |
|          | NM_001162862 | COX11     | NA    | NA | NA | NA | -0.155 | 0.793 | 0.737  | 0.004 | -0.205 | 0.802  |
|          |              | NM_078470 | COX15 | NA | NA | NA | NA     | 0.145 | 0.793  | 0.255 | 0.372  | -0.271 |
|          | NM_005694    | COX17     | NA    | NA | NA | NA | -0.341 | 0.358 | -0.947 | 0.000 | -0.187 | 0.798  |

|              |         |    |    |    |    |        |       |        |       |        |       |
|--------------|---------|----|----|----|----|--------|-------|--------|-------|--------|-------|
| NM_001861    | COX4I1  | NA | NA | NA | NA | -0.039 | 0.967 | -0.114 | 0.714 | -0.124 | 0.896 |
| NM_004255    | COX5A   | NA | NA | NA | NA | -0.167 | 0.750 | -0.097 | 0.784 | -0.292 | 0.612 |
| NM_001862    | COX5B   | NA | NA | NA | NA | -0.356 | 0.323 | 0.452  | 0.093 | -0.066 | 0.962 |
| NM_004373    | COX6A1  | NA | NA | NA | NA | -0.370 | 0.303 | 0.563  | 0.029 | -0.298 | 0.566 |
| NM_001863    | COX6B1  | NA | NA | NA | NA | -0.208 | 0.654 | 0.447  | 0.096 | -0.159 | 0.856 |
| NM_004374    | COX6C   | NA | NA | NA | NA | -0.548 | 0.069 | -0.512 | 0.063 | -0.267 | 0.624 |
| NM_001864    | COX7A1  | NA | NA | NA | NA | -0.271 | 0.567 | -0.332 | 0.403 | -0.087 | 0.956 |
| NM_001865    | COX7A2  | NA | NA | NA | NA | -0.280 | 0.477 | -0.612 | 0.017 | -0.111 | 0.918 |
| NM_004718    | COX7A2L | NA | NA | NA | NA | -0.089 | 0.885 | 0.218  | 0.444 | 0.095  | 0.935 |
| NM_001866    | COX7B   | NA | NA | NA | NA | -0.444 | 0.181 | -0.680 | 0.014 | -0.375 | 0.371 |
| NM_001867    | COX7C   | NA | NA | NA | NA | -0.393 | 0.257 | -0.256 | 0.363 | -0.333 | 0.468 |
| NM_004074    | COX8A   | NA | NA | NA | NA | -0.486 | 0.124 | 0.045  | 0.903 | -0.197 | 0.787 |
| NM_004541    | NDUFA1  | NA | NA | NA | NA | -0.359 | 0.323 | 0.317  | 0.264 | -0.295 | 0.565 |
| NM_004544    | NDUFA10 | NA | NA | NA | NA | -0.108 | 0.858 | 0.721  | 0.004 | -0.091 | 0.944 |
| NM_001258338 | NDUFA12 | NA | NA | NA | NA | -0.057 | 0.945 | 0.194  | 0.532 | 0.044  | 0.985 |
| NM_002488    | NDUFA2  | NA | NA | NA | NA | -0.096 | 0.883 | 0.175  | 0.578 | 0.113  | 0.921 |
| NM_004542    | NDUFA3  | NA | NA | NA | NA | -0.209 | 0.662 | 0.611  | 0.035 | -0.412 | 0.306 |
| NM_002489    | NDUFA4  | NA | NA | NA | NA | -0.188 | 0.698 | 0.770  | 0.003 | -0.170 | 0.841 |
| NM_001291304 | NDUFA5  | NA | NA | NA | NA | -0.123 | 0.822 | 0.338  | 0.217 | 0.077  | 0.953 |
| NM_002490    | NDUFA6  | NA | NA | NA | NA | 0.057  | 0.942 | 1.371  | 0.000 | 0.135  | 0.884 |
| NM_005001    | NDUFA7  | NA | NA | NA | NA | -0.663 | 0.024 | 0.117  | 0.763 | -0.166 | 0.845 |
| NM_014222    | NDUFA8  | NA | NA | NA | NA | -0.169 | 0.745 | 0.535  | 0.044 | -0.124 | 0.902 |
| NM_005002    | NDUFA9  | NA | NA | NA | NA | -0.200 | 0.668 | 0.531  | 0.044 | 0.053  | 0.978 |
| NM_005003    | NDUFAB1 | NA | NA | NA | NA | -0.170 | 0.735 | 0.362  | 0.196 | 0.013  | 1.000 |
| NM_004545    | NDUFB1  | NA | NA | NA | NA | -0.442 | 0.206 | -0.095 | 0.848 | -0.427 | 0.274 |
| NM_004548    | NDUFB10 | NA | NA | NA | NA | -0.099 | 0.872 | 0.687  | 0.007 | -0.202 | 0.785 |
| NM_004546    | NDUFB2  | NA | NA | NA | NA | -0.302 | 0.428 | -0.002 | 1.000 | -0.065 | 0.962 |
| NM_002491    | NDUFB3  | NA | NA | NA | NA | -0.469 | 0.163 | 0.529  | 0.075 | -0.383 | 0.365 |

|              |          |    |    |    |    |        |       |        |       |        |       |
|--------------|----------|----|----|----|----|--------|-------|--------|-------|--------|-------|
| NM_004547    | NDUFB4   | NA | NA | NA | NA | -0.330 | 0.380 | 0.543  | 0.034 | -0.270 | 0.625 |
| NM_001199958 | NDUFB5   | NA | NA | NA | NA | -0.162 | 0.753 | 0.048  | 0.900 | 0.097  | 0.935 |
| NM_002493    | NDUFB6   | NA | NA | NA | NA | -0.214 | 0.639 | 0.370  | 0.195 | -0.203 | 0.778 |
| NM_004146    | NDUFB7   | NA | NA | NA | NA | -0.245 | 0.568 | 0.978  | 0.000 | -0.116 | 0.913 |
| NM_005004    | NDUFB8   | NA | NA | NA | NA | -0.410 | 0.218 | -0.311 | 0.257 | -0.119 | 0.903 |
| NM_005005    | NDUFB9   | NA | NA | NA | NA | -0.262 | 0.526 | 1.288  | 0.000 | 0.095  | 0.937 |
| NM_001184990 | NDUFC1   | NA | NA | NA | NA | -0.199 | 0.673 | 0.624  | 0.026 | -0.228 | 0.722 |
| NM_001204055 | NDUFC2   | NA | NA | NA | NA | -0.089 | 0.892 | -0.372 | 0.207 | -0.073 | 0.959 |
| NM_001199981 | NDUFS1   | NA | NA | NA | NA | -0.016 | 1.000 | 0.073  | 0.831 | 0.001  | 1.000 |
| NM_004550    | NDUFS2   | NA | NA | NA | NA | 0.133  | 0.806 | 0.107  | 0.743 | -0.116 | 0.911 |
| NM_004551    | NDUFS3   | NA | NA | NA | NA | -0.312 | 0.434 | 0.827  | 0.001 | -0.269 | 0.641 |
| NM_002495    | NDUFS4   | NA | NA | NA | NA | -0.236 | 0.606 | 0.216  | 0.505 | 0.062  | 0.968 |
| NM_004552    | NDUFS5   | NA | NA | NA | NA | -0.142 | 0.791 | 0.342  | 0.234 | -0.074 | 0.959 |
| NM_004553    | NDUFS6   | NA | NA | NA | NA | -0.332 | 0.401 | 1.107  | 0.000 | -0.194 | 0.801 |
| NM_024407    | NDUFS7   | NA | NA | NA | NA | -0.338 | 0.381 | 1.321  | 0.000 | -0.267 | 0.662 |
| NM_002496    | NDUFS8   | NA | NA | NA | NA | -0.229 | 0.611 | 0.799  | 0.002 | -0.351 | 0.460 |
| NM_001166102 | NDUFV1   | NA | NA | NA | NA | 0.042  | 0.966 | 0.805  | 0.001 | -0.193 | 0.801 |
| NM_021074    | NDUFV2   | NA | NA | NA | NA | 0.105  | 0.859 | -0.007 | 1.000 | 0.165  | 0.840 |
| NM_021075    | NDUFV3   | NA | NA | NA | NA | -0.076 | 0.922 | 1.139  | 0.000 | -0.117 | 0.921 |
| NM_004589    | SCO1     | NA | NA | NA | NA | 0.093  | 0.901 | 0.756  | 0.004 | 0.204  | 0.797 |
| NM_001294332 | SDHA     | NA | NA | NA | NA | 0.528  | 0.084 | 0.265  | 0.352 | -0.149 | 0.872 |
| NM_003000    | SDHB     | NA | NA | NA | NA | -0.105 | 0.861 | 0.428  | 0.113 | -0.067 | 0.962 |
| NM_003001    | SDHC     | NA | NA | NA | NA | -0.114 | 0.847 | 0.247  | 0.421 | -0.036 | 0.994 |
| NM_001276503 | SDHD     | NA | NA | NA | NA | -0.033 | 0.980 | 0.340  | 0.238 | 0.181  | 0.815 |
| NM_001282198 | SLC25A14 | NA | NA | NA | NA | -0.641 | 0.072 | 1.188  | 0.000 | 0.054  | 0.983 |
| NM_001204052 | SLC25A27 | NA | NA | NA | NA | -0.122 | 0.883 | -0.075 | 0.854 | 0.188  | 0.894 |
| NM_002635    | SLC25A3  | NA | NA | NA | NA | -0.076 | 0.912 | -0.026 | 0.949 | -0.259 | 0.644 |
| NM_001151    | SLC25A4  | NA | NA | NA | NA | -0.203 | 0.656 | 0.282  | 0.305 | -0.106 | 0.925 |

|           |              |         |    |    |    |       |        |       |        |        |        |       |
|-----------|--------------|---------|----|----|----|-------|--------|-------|--------|--------|--------|-------|
|           | NM_001152    | SLC25A5 | NA | NA | NA | NA    | 0.003  | 1.000 | -0.304 | 0.262  | -0.008 | 1.000 |
|           | NM_003172    | SURF1   | NA | NA | NA | NA    | 0.025  | 0.990 | 0.841  | 0.001  | 0.106  | 0.933 |
|           | NM_003355    | UCP2    | NA | NA | NA | NA    | 0.215  | 0.696 | 0.306  | 0.370  | 0.005  | 1.000 |
|           | NM_013387    | UQCR10  | NA | NA | NA | NA    | 0.025  | 0.989 | 0.503  | 0.059  | 0.052  | 0.977 |
|           | NM_006830    | UQCR11  | NA | NA | NA | NA    | -0.136 | 0.798 | 0.474  | 0.071  | 0.045  | 0.983 |
|           | NM_006294    | UQCRB   | NA | NA | NA | NA    | -0.452 | 0.169 | 0.513  | 0.045  | -0.101 | 0.933 |
|           | NM_003365    | UQCRC1  | NA | NA | NA | NA    | 0.035  | 0.973 | 0.497  | 0.052  | -0.135 | 0.884 |
|           | NM_003366    | UQCRC2  | NA | NA | NA | NA    | -0.098 | 0.877 | -0.352 | 0.197  | 0.053  | 0.978 |
|           | NM_006003    | UQCRFS1 | NA | NA | NA | NA    | 0.096  | 0.881 | 0.827  | 0.001  | 0.102  | 0.934 |
|           | NM_001297566 | UQCRH   | NA | NA | NA | NA    | -0.237 | 0.612 | -0.201 | 0.526  | 0.032  | 0.998 |
|           | NM_014402    | UQCRQ   | NA | NA | NA | NA    | -0.380 | 0.270 | 0.966  | 0.000  | -0.040 | 0.988 |
| G25+Palim | NM_001001937 | ATP5A1  | NA | NA | NA | NA    | -0.310 | 0.355 | NA     | NA     | -0.285 | 0.560 |
|           | NM_001686    | ATP5B   | NA | NA | NA | NA    | -0.169 | 0.691 | NA     | NA     | 0.011  | 1.000 |
|           | NM_005174    | ATP5C1  | NA | NA | NA | NA    | 0.028  | 0.975 | NA     | NA     | -0.116 | 0.902 |
|           | NM_001687    | ATP5D   | NA | NA | NA | NA    | -0.139 | 0.778 | NA     | NA     | 0.031  | 1.000 |
|           | NM_001688    | ATP5F1  | NA | NA | NA | NA    | -0.093 | 0.866 | NA     | NA     | -0.026 | 1.000 |
|           | NM_005175    | ATP5G1  | NA | NA | NA | NA    | -0.212 | 0.618 | NA     | NA     | 0.280  | 0.598 |
|           | NM_001002031 | ATP5G2  | NA | NA | NA | NA    | -0.366 | 0.254 | NA     | NA     | -0.263 | 0.627 |
|           | NM_001689    | ATP5G3  | NA | NA | NA | NA    | -0.072 | 0.903 | NA     | NA     | 0.028  | 1.000 |
|           | NM_006356    | ATP5H   | NA | NA | NA | NA    | -0.154 | 0.738 | NA     | NA     | -0.295 | 0.560 |
|           | NM_007100    | ATP5I   | NA | NA | NA | NA    | -0.003 | 1.000 | NA     | NA     | 0.235  | 0.701 |
|           | NM_004889    | ATP5J2  | NA | NA | NA | NA    | -0.208 | 0.610 | NA     | NA     | 0.021  | 1.000 |
|           | NM_006476    | ATP5L   | NA | NA | NA | NA    | -0.365 | 0.252 | NA     | NA     | -0.031 | 1.000 |
|           | NM_001697    | ATP5O   | NA | NA | NA | NA    | 0.090  | 0.871 | NA     | NA     | 0.101  | 0.923 |
|           | NM_001003805 | ATP5S   | NA | NA | NA | NA    | -0.150 | 0.797 | NA     | NA     | -0.267 | 0.690 |
|           | NM_178190    | ATPIF1  | NA | NA | NA | NA    | -0.322 | 0.344 | NA     | NA     | -0.116 | 0.903 |
|           | NM_001162862 | COX11   | NA | NA | NA | NA    | -0.310 | 0.433 | NA     | NA     | 0.123  | 0.906 |
| NM_078470 | COX15        | NA      | NA | NA | NA | 0.170 | 0.710  | NA    | NA     | -0.172 | 0.832  |       |

|              |         |    |    |    |    |        |       |    |    |        |       |
|--------------|---------|----|----|----|----|--------|-------|----|----|--------|-------|
| NM_005694    | COX17   | NA | NA | NA | NA | -0.177 | 0.682 | NA | NA | -0.081 | 0.952 |
| NM_001861    | COX4I1  | NA | NA | NA | NA | 0.085  | 0.880 | NA | NA | 0.069  | 0.967 |
| NM_004255    | COX5A   | NA | NA | NA | NA | -0.098 | 0.861 | NA | NA | -0.085 | 0.953 |
| NM_001862    | COX5B   | NA | NA | NA | NA | -0.191 | 0.647 | NA | NA | -0.142 | 0.865 |
| NM_004373    | COX6A1  | NA | NA | NA | NA | -0.216 | 0.595 | NA | NA | -0.236 | 0.701 |
| NM_001863    | COX6B1  | NA | NA | NA | NA | -0.061 | 0.925 | NA | NA | -0.038 | 0.994 |
| NM_004374    | COX6C   | NA | NA | NA | NA | -0.293 | 0.401 | NA | NA | -0.169 | 0.820 |
| NM_001864    | COX7A1  | NA | NA | NA | NA | -0.022 | 0.988 | NA | NA | 0.292  | 0.622 |
| NM_001865    | COX7A2  | NA | NA | NA | NA | -0.116 | 0.818 | NA | NA | 0.092  | 0.935 |
| NM_004718    | COX7A2L | NA | NA | NA | NA | 0.025  | 0.977 | NA | NA | 0.104  | 0.917 |
| NM_001866    | COX7B   | NA | NA | NA | NA | -0.157 | 0.730 | NA | NA | -0.219 | 0.730 |
| NM_001867    | COX7C   | NA | NA | NA | NA | -0.051 | 0.940 | NA | NA | -0.149 | 0.855 |
| NM_004074    | COX8A   | NA | NA | NA | NA | -0.539 | 0.057 | NA | NA | -0.049 | 0.982 |
| NM_004541    | NDUFA1  | NA | NA | NA | NA | -0.310 | 0.373 | NA | NA | -0.158 | 0.841 |
| NM_004544    | NDUFA10 | NA | NA | NA | NA | -0.164 | 0.718 | NA | NA | -0.184 | 0.804 |
| NM_001258338 | NDUFA12 | NA | NA | NA | NA | 0.049  | 0.944 | NA | NA | 0.136  | 0.875 |
| NM_002488    | NDUFA2  | NA | NA | NA | NA | -0.138 | 0.781 | NA | NA | 0.144  | 0.870 |
| NM_004542    | NDUFA3  | NA | NA | NA | NA | -0.278 | 0.458 | NA | NA | -0.025 | 1.000 |
| NM_002489    | NDUFA4  | NA | NA | NA | NA | 0.052  | 0.940 | NA | NA | -0.072 | 0.967 |
| NM_001291304 | NDUFA5  | NA | NA | NA | NA | -0.069 | 0.910 | NA | NA | 0.141  | 0.864 |
| NM_002490    | NDUFA6  | NA | NA | NA | NA | 0.228  | 0.556 | NA | NA | 0.190  | 0.782 |
| NM_005001    | NDUFA7  | NA | NA | NA | NA | -0.576 | 0.046 | NA | NA | -0.055 | 0.981 |
| NM_014222    | NDUFA8  | NA | NA | NA | NA | 0.002  | 1.000 | NA | NA | -0.096 | 0.936 |
| NM_005002    | NDUFA9  | NA | NA | NA | NA | -0.059 | 0.926 | NA | NA | 0.086  | 0.946 |
| NM_005003    | NDUFAB1 | NA | NA | NA | NA | -0.208 | 0.612 | NA | NA | -0.078 | 0.957 |
| NM_004545    | NDUFB1  | NA | NA | NA | NA | -0.515 | 0.093 | NA | NA | -0.299 | 0.560 |
| NM_004548    | NDUFB10 | NA | NA | NA | NA | -0.205 | 0.619 | NA | NA | 0.086  | 0.949 |
| NM_004546    | NDUFB2  | NA | NA | NA | NA | -0.391 | 0.212 | NA | NA | 0.093  | 0.934 |

|              |          |    |    |    |    |        |       |    |    |        |       |
|--------------|----------|----|----|----|----|--------|-------|----|----|--------|-------|
| NM_002491    | NDUFB3   | NA | NA | NA | NA | -0.369 | 0.273 | NA | NA | -0.211 | 0.752 |
| NM_004547    | NDUFB4   | NA | NA | NA | NA | -0.250 | 0.505 | NA | NA | -0.159 | 0.842 |
| NM_001199958 | NDUFB5   | NA | NA | NA | NA | -0.255 | 0.497 | NA | NA | 0.126  | 0.889 |
| NM_002493    | NDUFB6   | NA | NA | NA | NA | -0.215 | 0.596 | NA | NA | -0.098 | 0.927 |
| NM_004146    | NDUFB7   | NA | NA | NA | NA | -0.358 | 0.275 | NA | NA | 0.116  | 0.905 |
| NM_005004    | NDUFB8   | NA | NA | NA | NA | -0.289 | 0.405 | NA | NA | 0.098  | 0.925 |
| NM_005005    | NDUFB9   | NA | NA | NA | NA | -0.221 | 0.575 | NA | NA | 0.029  | 1.000 |
| NM_001184990 | NDUFC1   | NA | NA | NA | NA | -0.061 | 0.924 | NA | NA | -0.204 | 0.761 |
| NM_001204055 | NDUFC2   | NA | NA | NA | NA | -0.153 | 0.741 | NA | NA | 0.136  | 0.875 |
| NM_001199981 | NDUFS1   | NA | NA | NA | NA | -0.083 | 0.888 | NA | NA | 0.047  | 0.985 |
| NM_004550    | NDUFS2   | NA | NA | NA | NA | 0.030  | 0.972 | NA | NA | -0.084 | 0.950 |
| NM_004551    | NDUFS3   | NA | NA | NA | NA | -0.266 | 0.485 | NA | NA | -0.041 | 0.990 |
| NM_002495    | NDUFS4   | NA | NA | NA | NA | 0.113  | 0.838 | NA | NA | 0.053  | 0.983 |
| NM_004552    | NDUFS5   | NA | NA | NA | NA | -0.029 | 0.974 | NA | NA | -0.034 | 0.997 |
| NM_004553    | NDUFS6   | NA | NA | NA | NA | -0.131 | 0.798 | NA | NA | 0.176  | 0.819 |
| NM_024407    | NDUFS7   | NA | NA | NA | NA | -0.499 | 0.102 | NA | NA | 0.068  | 0.972 |
| NM_002496    | NDUFS8   | NA | NA | NA | NA | -0.452 | 0.149 | NA | NA | -0.064 | 0.974 |
| NM_001166102 | NDUFV1   | NA | NA | NA | NA | -0.147 | 0.754 | NA | NA | -0.018 | 1.000 |
| NM_021074    | NDUFV2   | NA | NA | NA | NA | 0.335  | 0.316 | NA | NA | 0.361  | 0.391 |
| NM_021075    | NDUFV3   | NA | NA | NA | NA | -0.021 | 0.985 | NA | NA | 0.119  | 0.908 |
| NM_004589    | SCO1     | NA | NA | NA | NA | -0.120 | 0.835 | NA | NA | 0.017  | 1.000 |
| NM_001294332 | SDHA     | NA | NA | NA | NA | 0.241  | 0.525 | NA | NA | -0.084 | 0.952 |
| NM_003000    | SDHB     | NA | NA | NA | NA | -0.084 | 0.886 | NA | NA | 0.032  | 1.000 |
| NM_003001    | SDHC     | NA | NA | NA | NA | -0.365 | 0.277 | NA | NA | -0.257 | 0.660 |
| NM_001276503 | SDHD     | NA | NA | NA | NA | -0.001 | 1.000 | NA | NA | 0.186  | 0.795 |
| NM_001282198 | SLC25A14 | NA | NA | NA | NA | -0.427 | 0.251 | NA | NA | 0.260  | 0.699 |
| NM_001204052 | SLC25A27 | NA | NA | NA | NA | -0.106 | 0.880 | NA | NA | 0.250  | 0.814 |
| NM_002635    | SLC25A3  | NA | NA | NA | NA | -0.019 | 0.985 | NA | NA | -0.215 | 0.736 |



|              |         |    |    |    |    |        |       |    |    |        |       |
|--------------|---------|----|----|----|----|--------|-------|----|----|--------|-------|
| NM_001151    | SLC25A4 | NA | NA | NA | NA | -0.135 | 0.774 | NA | NA | -0.023 | 1.000 |
| NM_001152    | SLC25A5 | NA | NA | NA | NA | -0.013 | 0.996 | NA | NA | 0.210  | 0.742 |
| NM_003172    | SURF1   | NA | NA | NA | NA | 0.093  | 0.869 | NA | NA | 0.282  | 0.604 |
| NM_003355    | UCP2    | NA | NA | NA | NA | -0.751 | 0.017 | NA | NA | 0.594  | 0.068 |
| NM_013387    | UQCR10  | NA | NA | NA | NA | 0.073  | 0.901 | NA | NA | 0.089  | 0.940 |
| NM_006830    | UQCR11  | NA | NA | NA | NA | -0.263 | 0.468 | NA | NA | 0.044  | 0.986 |
| NM_006294    | UQCRB   | NA | NA | NA | NA | -0.164 | 0.712 | NA | NA | -0.073 | 0.963 |
| NM_003365    | UQCRC1  | NA | NA | NA | NA | 0.055  | 0.930 | NA | NA | -0.042 | 0.988 |
| NM_003366    | UQCRC2  | NA | NA | NA | NA | -0.063 | 0.922 | NA | NA | 0.033  | 0.999 |
| NM_006003    | UQCRFS1 | NA | NA | NA | NA | 0.029  | 0.976 | NA | NA | 0.131  | 0.887 |
| NM_001297566 | UQCRH   | NA | NA | NA | NA | 0.044  | 0.958 | NA | NA | 0.126  | 0.899 |
| NM_014402    | UQCRQ   | NA | NA | NA | NA | -0.197 | 0.628 | NA | NA | 0.121  | 0.893 |

**Supplementary Table S4.** Quantitative data related to the transcriptomic profiles of the outer and inner mitochondrial membrane translocases TOM/TIM machinery in human islets upon metabolic stress. NA: Not applicable (condition not tested); ND: not detected.

|      | Accession<br>(NCBI Ref.<br>Sequence) | Gene<br>symbol | Donor #1            |                   | Donor #2            |                   | Donor #3            |                   | Donor #4            |                   | Donor #5            |                   |
|------|--------------------------------------|----------------|---------------------|-------------------|---------------------|-------------------|---------------------|-------------------|---------------------|-------------------|---------------------|-------------------|
|      |                                      |                | Log <sub>2</sub> FC | Adjusted <i>p</i> | Log <sub>2</sub> FC | Adjusted <i>p</i> | Log <sub>2</sub> FC | Adjusted <i>p</i> | Log <sub>2</sub> FC | Adjusted <i>p</i> | Log <sub>2</sub> FC | Adjusted <i>p</i> |
| Olea | NM_012456                            | TIMM10         | 0.302               | 0.646             | 0.666               | 0.191             | NA                  | NA                | 0.500               | 0.215             | NA                  | NA                |
|      | NM_012192                            | TIMM10B        | 0.228               | 0.598             | -0.219              | 0.675             | NA                  | NA                | -0.044              | 0.956             | NA                  | NA                |
|      | NM_012458                            | TIMM13         | 1.084               | 0.020             | 0.574               | 0.198             | NA                  | NA                | 0.214               | 0.623             | NA                  | NA                |
|      | NM_006335                            | TIMM17A        | -0.476              | 0.209             | -0.016              | 1.000             | NA                  | NA                | -0.394              | 0.265             | NA                  | NA                |
|      | NM_005834                            | TIMM17B        | 1.590               | 0.007             | 0.639               | 0.183             | NA                  | NA                | 0.287               | 0.480             | NA                  | NA                |
|      | NM_014177                            | TIMM21         | -0.565              | 0.208             | -0.059              | 0.966             | NA                  | NA                | -0.461              | 0.234             | NA                  | NA                |
|      | NM_013337                            | TIMM22         | 0.499               | 0.297             | 0.338               | 0.528             | NA                  | NA                | 0.048               | 0.954             | NA                  | NA                |
|      | NM_006327                            | TIMM23         | -0.657              | 0.080             | 0.600               | 0.183             | NA                  | NA                | -0.081              | 0.915             | NA                  | NA                |

|              |         |        |       |        |       |    |    |        |       |    |    |
|--------------|---------|--------|-------|--------|-------|----|----|--------|-------|----|----|
| NM_001290117 | TIMM23B | ND     | ND    | ND     | ND    | NA | NA | -0.394 | 0.577 | NA | NA |
| NM_006351    | TIMM44  | 0.911  | 0.045 | 0.083  | 0.933 | NA | NA | -0.073 | 0.911 | NA | NA |
| NM_001001563 | TIMM50  | 0.602  | 0.225 | 0.369  | 0.507 | NA | NA | -0.142 | 0.791 | NA | NA |
| NM_004085    | TIMM8A  | -0.075 | 1.000 | -0.073 | 1.000 | NA | NA | -0.865 | 0.080 | NA | NA |
| NM_012459    | TIMM8B  | -0.188 | 0.826 | 0.127  | 0.886 | NA | NA | -0.168 | 0.772 | NA | NA |
| NM_001304485 | TIMM9   | -0.601 | 0.204 | 0.055  | 0.969 | NA | NA | -0.359 | 0.458 | NA | NA |
| NM_016589    | TIMMDC1 | -0.188 | 0.689 | 0.070  | 0.932 | NA | NA | -0.047 | 0.952 | NA | NA |
| NM_014765    | TOMM20  | -0.188 | 0.629 | 0.076  | 0.913 | NA | NA | -0.380 | 0.264 | NA | NA |
| NM_020243    | TOMM22  | -0.020 | 1.000 | 0.158  | 0.793 | NA | NA | 0.113  | 0.843 | NA | NA |
| NM_006809    | TOMM34  | -0.048 | 0.949 | 0.044  | 0.969 | NA | NA | 0.002  | 1.000 | NA | NA |
| NM_006114    | TOMM40  | 1.395  | 0.036 | 0.800  | 0.113 | NA | NA | -0.010 | 1.000 | NA | NA |
| NM_001286373 | TOMM40L | 0.572  | 0.375 | 0.254  | 0.767 | NA | NA | 0.174  | 0.791 | NA | NA |
| NM_001134485 | TOMM5   | -0.277 | 0.513 | 0.421  | 0.354 | NA | NA | 0.217  | 0.636 | NA | NA |
| NM_001134493 | TOMM6   | -0.365 | 0.350 | -0.057 | 0.949 | NA | NA | -0.068 | 0.918 | NA | NA |
| NM_019059    | TOMM7   | -0.146 | 0.797 | 0.153  | 0.807 | NA | NA | 0.141  | 0.783 | NA | NA |
| NM_014820    | TOMM70A | -0.177 | 0.657 | -0.068 | 0.930 | NA | NA | -0.324 | 0.378 | NA | NA |
| NM_012456    | TIMM10  | 0.353  | 0.618 | -0.207 | 1.000 | NA | NA | NA     | NA    | NA | NA |
| NM_012192    | TIMM10B | 0.378  | 0.350 | -0.151 | 1.000 | NA | NA | NA     | NA    | NA | NA |
| NM_012458    | TIMM13  | 1.052  | 0.034 | 0.180  | 1.000 | NA | NA | NA     | NA    | NA | NA |
| NM_006335    | TIMM17A | 0.004  | 1.000 | -0.090 | 1.000 | NA | NA | NA     | NA    | NA | NA |
| NM_005834    | TIMM17B | 1.983  | 0.000 | 0.399  | 1.000 | NA | NA | NA     | NA    | NA | NA |
| NM_014177    | TIMM21  | -0.332 | 0.515 | -0.106 | 1.000 | NA | NA | NA     | NA    | NA | NA |
| NM_013337    | TIMM22  | 0.572  | 0.245 | 0.060  | 1.000 | NA | NA | NA     | NA    | NA | NA |
| NM_006327    | TIMM23  | -0.044 | 0.978 | 0.172  | 1.000 | NA | NA | NA     | NA    | NA | NA |
| NM_001290117 | TIMM23B | ND     | ND    | ND     | ND    | NA | NA | NA     | NA    | NA | NA |
| NM_006351    | TIMM44  | 0.245  | 0.744 | -0.476 | 1.000 | NA | NA | NA     | NA    | NA | NA |
| NM_001001563 | TIMM50  | 0.155  | 0.896 | 0.223  | 1.000 | NA | NA | NA     | NA    | NA | NA |
| NM_004085    | TIMM8A  | -0.368 | 0.834 | -0.259 | 1.000 | NA | NA | NA     | NA    | NA | NA |

|           |              |         |        |       |        |       |        |       |        |       |    |    |
|-----------|--------------|---------|--------|-------|--------|-------|--------|-------|--------|-------|----|----|
| Palm      | NM_012459    | TIMM8B  | 0.129  | 0.945 | 0.066  | 1.000 | NA     | NA    | NA     | NA    | NA | NA |
|           | NM_001304485 | TIMM9   | 0.098  | 0.929 | -0.031 | 1.000 | NA     | NA    | NA     | NA    | NA | NA |
|           | NM_016589    | TIMMDC1 | 0.274  | 0.519 | -0.152 | 1.000 | NA     | NA    | NA     | NA    | NA | NA |
|           | NM_014765    | TOMM20  | 0.066  | 0.921 | -0.012 | 1.000 | NA     | NA    | NA     | NA    | NA | NA |
|           | NM_020243    | TOMM22  | -0.006 | 1.000 | -0.061 | 1.000 | NA     | NA    | NA     | NA    | NA | NA |
|           | NM_006809    | TOMM34  | -0.045 | 0.974 | -0.225 | 1.000 | NA     | NA    | NA     | NA    | NA | NA |
|           | NM_006114    | TOMM40  | 1.207  | 0.091 | 0.755  | 0.897 | NA     | NA    | NA     | NA    | NA | NA |
|           | NM_001286373 | TOMM40L | 0.576  | 0.367 | -0.218 | 1.000 | NA     | NA    | NA     | NA    | NA | NA |
|           | NM_001134485 | TOMM5   | -0.252 | 0.599 | 0.276  | 1.000 | NA     | NA    | NA     | NA    | NA | NA |
|           | NM_001134493 | TOMM6   | -0.062 | 0.954 | -0.235 | 1.000 | NA     | NA    | NA     | NA    | NA | NA |
|           | NM_019059    | TOMM7   | 0.426  | 0.309 | -0.100 | 1.000 | NA     | NA    | NA     | NA    | NA | NA |
| NM_014820 | TOMM70A      | -0.177  | 0.691  | 0.068 | 1.000  | NA    | NA     | NA    | NA     | NA    | NA |    |
| G25       | NM_012456    | TIMM10  | 0.062  | 0.989 | 0.734  | 0.128 | -0.276 | 0.608 | 1.104  | 0.000 | NA | NA |
|           | NM_012192    | TIMM10B | 0.192  | 0.644 | 0.129  | 0.819 | -0.233 | 0.619 | 0.783  | 0.002 | NA | NA |
|           | NM_012458    | TIMM13  | 1.202  | 0.007 | 0.712  | 0.069 | -0.356 | 0.359 | 0.317  | 0.282 | NA | NA |
|           | NM_006335    | TIMM17A | -0.147 | 0.743 | 0.691  | 0.052 | -0.133 | 0.827 | 0.424  | 0.127 | NA | NA |
|           | NM_005834    | TIMM17B | 2.315  | 0.000 | 0.594  | 0.214 | -0.185 | 0.730 | -0.210 | 0.529 | NA | NA |
|           | NM_014177    | TIMM21  | -0.931 | 0.020 | 0.414  | 0.411 | -0.291 | 0.520 | 0.965  | 0.000 | NA | NA |
|           | NM_013337    | TIMM22  | 0.605  | 0.147 | 0.623  | 0.142 | 0.049  | 0.969 | 0.793  | 0.002 | NA | NA |
|           | NM_006327    | TIMM23  | -0.269 | 0.516 | 0.763  | 0.046 | -0.077 | 0.931 | 1.135  | 0.000 | NA | NA |
|           | NM_001290117 | TIMM23B | ND     | ND    | ND     | ND    | -1.297 | 0.065 | 0.202  | 0.744 | NA | NA |
|           | NM_006351    | TIMM44  | 0.537  | 0.283 | 0.261  | 0.625 | -0.099 | 0.910 | 0.403  | 0.155 | NA | NA |
|           | NM_001001563 | TIMM50  | 0.205  | 0.759 | 0.231  | 0.710 | -0.157 | 0.807 | 0.972  | 0.000 | NA | NA |
|           | NM_004085    | TIMM8A  | 0.262  | 0.797 | 0.610  | 0.565 | -0.158 | 0.874 | 1.106  | 0.001 | NA | NA |
|           | NM_012459    | TIMM8B  | 0.812  | 0.079 | 0.029  | 1.000 | -0.288 | 0.522 | 0.370  | 0.246 | NA | NA |
|           | NM_001304485 | TIMM9   | -0.317 | 0.494 | -0.288 | 0.629 | -0.702 | 0.067 | 0.290  | 0.431 | NA | NA |
|           | NM_016589    | TIMMDC1 | 0.053  | 0.944 | 0.338  | 0.395 | 0.067  | 0.940 | 0.242  | 0.433 | NA | NA |
|           | NM_014765    | TOMM20  | -0.308 | 0.338 | -0.450 | 0.187 | -0.166 | 0.772 | -0.819 | 0.001 | NA | NA |

|                   |              |         |        |       |        |       |        |        |        |        |        |       |
|-------------------|--------------|---------|--------|-------|--------|-------|--------|--------|--------|--------|--------|-------|
| G25 + Olea + Palm | NM_020243    | TOMM22  | 0.140  | 0.764 | 0.259  | 0.557 | -0.322 | 0.448  | 0.124  | 0.736  | NA     | NA    |
|                   | NM_006809    | TOMM34  | 0.297  | 0.409 | -0.200 | 0.650 | -0.338 | 0.390  | -0.388 | 0.173  | NA     | NA    |
|                   | NM_006114    | TOMM40  | 2.089  | 0.000 | 0.660  | 0.212 | 0.105  | 0.884  | 0.558  | 0.050  | NA     | NA    |
|                   | NM_001286373 | TOMM40L | 0.542  | 0.410 | -0.105 | 0.965 | 0.121  | 0.920  | -0.295 | 0.457  | NA     | NA    |
|                   | NM_001134485 | TOMM5   | 0.255  | 0.519 | 0.507  | 0.187 | -0.118 | 0.852  | -0.003 | 1.000  | NA     | NA    |
|                   | NM_001134493 | TOMM6   | -0.118 | 0.791 | 0.436  | 0.241 | -0.297 | 0.486  | -0.237 | 0.449  | NA     | NA    |
|                   | NM_019059    | TOMM7   | 0.129  | 0.817 | 0.262  | 0.578 | -0.347 | 0.386  | -0.799 | 0.003  | NA     | NA    |
|                   | NM_014820    | TOMM70A | -0.416 | 0.175 | 0.047  | 0.962 | 0.709  | 0.018  | 1.253  | 0.000  | NA     | NA    |
|                   | NM_012456    | TIMM10  | NA     | NA    | NA     | NA    | NA     | NA     | 0.049  | 0.968  | -0.213 | 0.886 |
|                   | NM_012192    | TIMM10B | NA     | NA    | NA     | NA    | NA     | NA     | 0.021  | 0.993  | 0.022  | 1.000 |
|                   | NM_012458    | TIMM13  | NA     | NA    | NA     | NA    | NA     | NA     | -0.067 | 0.937  | -0.165 | 0.919 |
|                   | NM_006335    | TIMM17A | NA     | NA    | NA     | NA    | NA     | NA     | 0.106  | 0.875  | -0.078 | 1.000 |
|                   | NM_005834    | TIMM17B | NA     | NA    | NA     | NA    | NA     | NA     | -0.022 | 0.991  | 0.021  | 1.000 |
|                   | NM_014177    | TIMM21  | NA     | NA    | NA     | NA    | NA     | NA     | -0.126 | 0.851  | -0.116 | 0.980 |
|                   | NM_013337    | TIMM22  | NA     | NA    | NA     | NA    | NA     | NA     | 0.216  | 0.673  | 0.053  | 1.000 |
|                   | NM_006327    | TIMM23  | NA     | NA    | NA     | NA    | NA     | NA     | 0.332  | 0.441  | -0.011 | 1.000 |
|                   | NM_001290117 | TIMM23B | NA     | NA    | NA     | NA    | NA     | NA     | -0.068 | 0.990  | 0.830  | 0.315 |
|                   | NM_006351    | TIMM44  | NA     | NA    | NA     | NA    | NA     | NA     | 0.072  | 0.943  | -0.157 | 0.950 |
|                   | NM_001001563 | TIMM50  | NA     | NA    | NA     | NA    | NA     | NA     | 0.154  | 0.808  | -0.090 | 1.000 |
|                   | NM_004085    | TIMM8A  | NA     | NA    | NA     | NA    | NA     | NA     | 0.113  | 0.930  | -0.072 | 1.000 |
|                   | NM_012459    | TIMM8B  | NA     | NA    | NA     | NA    | NA     | NA     | -0.217 | 0.684  | -0.079 | 1.000 |
|                   | NM_001304485 | TIMM9   | NA     | NA    | NA     | NA    | NA     | NA     | -0.634 | 0.119  | -0.420 | 0.555 |
|                   | NM_016589    | TIMMDC1 | NA     | NA    | NA     | NA    | NA     | NA     | 0.109  | 0.869  | 0.058  | 1.000 |
|                   | NM_014765    | TOMM20  | NA     | NA    | NA     | NA    | NA     | NA     | -0.203 | 0.703  | -0.378 | 0.497 |
| NM_020243         | TOMM22       | NA      | NA     | NA    | NA     | NA    | NA     | -0.037 | 0.978  | -0.183 | 0.899  |       |
| NM_006809         | TOMM34       | NA      | NA     | NA    | NA     | NA    | NA     | -0.472 | 0.166  | -0.462 | 0.264  |       |
| NM_006114         | TOMM40       | NA      | NA     | NA    | NA     | NA    | NA     | 0.336  | 0.416  | 0.483  | 0.283  |       |
| NM_001286373      | TOMM40L      | NA      | NA     | NA    | NA     | NA    | NA     | 0.167  | 0.859  | 0.058  | 1.000  |       |

|            |              |         |    |    |    |        |        |        |        |        |        |       |
|------------|--------------|---------|----|----|----|--------|--------|--------|--------|--------|--------|-------|
|            | NM_001134485 | TOMM5   | NA | NA | NA | NA     | NA     | NA     | 0.118  | 0.851  | -0.011 | 1.000 |
|            | NM_001134493 | TOMM6   | NA | NA | NA | NA     | NA     | NA     | -0.070 | 0.936  | -0.280 | 0.712 |
|            | NM_019059    | TOMM7   | NA | NA | NA | NA     | NA     | NA     | -0.347 | 0.397  | -0.200 | 0.870 |
|            | NM_014820    | TOMM70A | NA | NA | NA | NA     | NA     | NA     | 0.675  | 0.029  | 1.027  | 0.000 |
| G25 + Olea | NM_012456    | TIMM10  | NA | NA | NA | NA     | -0.199 | 0.732  | 1.214  | 0.000  | -0.092 | 0.956 |
|            | NM_012192    | TIMM10B | NA | NA | NA | NA     | -0.005 | 1.000  | 1.009  | 0.000  | -0.064 | 0.965 |
|            | NM_012458    | TIMM13  | NA | NA | NA | NA     | -0.194 | 0.687  | 0.812  | 0.001  | -0.172 | 0.838 |
|            | NM_006335    | TIMM17A | NA | NA | NA | NA     | -0.002 | 1.000  | 0.448  | 0.089  | 0.000  | 1.000 |
|            | NM_005834    | TIMM17B | NA | NA | NA | NA     | -0.111 | 0.856  | 0.357  | 0.198  | -0.072 | 0.960 |
|            | NM_014177    | TIMM21  | NA | NA | NA | NA     | -0.163 | 0.767  | 0.839  | 0.001  | -0.018 | 1.000 |
|            | NM_013337    | TIMM22  | NA | NA | NA | NA     | -0.019 | 0.998  | 0.849  | 0.001  | -0.183 | 0.823 |
|            | NM_006327    | TIMM23  | NA | NA | NA | NA     | 0.165  | 0.760  | 0.942  | 0.000  | -0.062 | 0.969 |
|            | NM_001290117 | TIMM23B | NA | NA | NA | NA     | 0.329  | 0.727  | 0.084  | 0.944  | 0.519  | 0.639 |
|            | NM_006351    | TIMM44  | NA | NA | NA | NA     | -0.005 | 1.000  | 0.318  | 0.255  | -0.369 | 0.508 |
|            | NM_001001563 | TIMM50  | NA | NA | NA | NA     | -0.110 | 0.873  | 1.130  | 0.000  | -0.110 | 0.935 |
|            | NM_004085    | TIMM8A  | NA | NA | NA | NA     | -0.308 | 0.655  | -0.157 | 0.741  | -0.499 | 0.490 |
|            | NM_012459    | TIMM8B  | NA | NA | NA | NA     | -0.129 | 0.830  | 0.321  | 0.299  | 0.005  | 1.000 |
|            | NM_001304485 | TIMM9   | NA | NA | NA | NA     | -0.635 | 0.093  | -0.104 | 0.808  | -0.369 | 0.570 |
|            | NM_016589    | TIMMDC1 | NA | NA | NA | NA     | 0.039  | 0.969  | 0.242  | 0.403  | 0.064  | 0.964 |
|            | NM_014765    | TOMM20  | NA | NA | NA | NA     | -0.295 | 0.477  | -1.257 | 0.000  | -0.263 | 0.674 |
|            | NM_020243    | TOMM22  | NA | NA | NA | NA     | -0.171 | 0.748  | 0.551  | 0.037  | -0.067 | 0.965 |
|            | NM_006809    | TOMM34  | NA | NA | NA | NA     | -0.400 | 0.252  | -0.342 | 0.212  | -0.560 | 0.082 |
|            | NM_006114    | TOMM40  | NA | NA | NA | NA     | 0.112  | 0.854  | 0.870  | 0.001  | -0.033 | 1.000 |
|            | NM_001286373 | TOMM40L | NA | NA | NA | NA     | 0.155  | 0.859  | 0.261  | 0.461  | -0.106 | 0.962 |
|            | NM_001134485 | TOMM5   | NA | NA | NA | NA     | 0.027  | 0.988  | 0.126  | 0.710  | -0.101 | 0.931 |
|            | NM_001134493 | TOMM6   | NA | NA | NA | NA     | -0.311 | 0.431  | 0.340  | 0.216  | -0.158 | 0.857 |
| NM_019059  | TOMM7        | NA      | NA | NA | NA | -0.504 | 0.126  | -0.667 | 0.011  | -0.179 | 0.823  |       |
| NM_014820  | TOMM70A      | NA      | NA | NA | NA | 0.601  | 0.051  | 1.126  | 0.000  | 1.051  | 0.000  |       |

|              |              |         |    |    |    |        |        |       |    |        |        |       |
|--------------|--------------|---------|----|----|----|--------|--------|-------|----|--------|--------|-------|
| G25 + Palm   | NM_012456    | TIMM10  | NA | NA | NA | NA     | -0.083 | 0.902 | NA | NA     | 0.065  | 0.980 |
|              | NM_012192    | TIMM10B | NA | NA | NA | NA     | -0.073 | 0.903 | NA | NA     | 0.102  | 0.924 |
|              | NM_012458    | TIMM13  | NA | NA | NA | NA     | -0.193 | 0.653 | NA | NA     | -0.140 | 0.878 |
|              | NM_006335    | TIMM17A | NA | NA | NA | NA     | 0.426  | 0.169 | NA | NA     | 0.263  | 0.637 |
|              | NM_005834    | TIMM17B | NA | NA | NA | NA     | -0.216 | 0.603 | NA | NA     | 0.095  | 0.937 |
|              | NM_014177    | TIMM21  | NA | NA | NA | NA     | -0.023 | 0.983 | NA | NA     | -0.061 | 0.980 |
|              | NM_013337    | TIMM22  | NA | NA | NA | NA     | -0.067 | 0.918 | NA | NA     | 0.078  | 0.962 |
|              | NM_006327    | TIMM23  | NA | NA | NA | NA     | 0.246  | 0.547 | NA | NA     | 0.020  | 1.000 |
|              | NM_001290117 | TIMM23B | NA | NA | NA | NA     | 0.197  | 0.863 | NA | NA     | 0.616  | 0.529 |
|              | NM_006351    | TIMM44  | NA | NA | NA | NA     | 0.340  | 0.374 | NA | NA     | -0.303 | 0.641 |
|              | NM_001001563 | TIMM50  | NA | NA | NA | NA     | 0.038  | 0.969 | NA | NA     | 0.101  | 0.936 |
|              | NM_004085    | TIMM8A  | NA | NA | NA | NA     | -0.436 | 0.397 | NA | NA     | -0.101 | 0.982 |
|              | NM_012459    | TIMM8B  | NA | NA | NA | NA     | 0.008  | 1.000 | NA | NA     | -0.052 | 0.984 |
|              | NM_001304485 | TIMM9   | NA | NA | NA | NA     | -0.303 | 0.501 | NA | NA     | -0.110 | 0.948 |
|              | NM_016589    | TIMMDC1 | NA | NA | NA | NA     | 0.062  | 0.923 | NA | NA     | 0.078  | 0.956 |
|              | NM_014765    | TOMM20  | NA | NA | NA | NA     | 0.007  | 1.000 | NA | NA     | -0.272 | 0.644 |
|              | NM_020243    | TOMM22  | NA | NA | NA | NA     | -0.062 | 0.926 | NA | NA     | -0.060 | 0.979 |
|              | NM_006809    | TOMM34  | NA | NA | NA | NA     | -0.461 | 0.129 | NA | NA     | -0.294 | 0.557 |
|              | NM_006114    | TOMM40  | NA | NA | NA | NA     | 0.218  | 0.605 | NA | NA     | 0.397  | 0.385 |
|              | NM_001286373 | TOMM40L | NA | NA | NA | NA     | 0.076  | 0.946 | NA | NA     | 0.067  | 0.988 |
| NM_001134485 | TOMM5        | NA      | NA | NA | NA | 0.242  | 0.521  | NA    | NA | 0.000  | 1.000  |       |
| NM_001134493 | TOMM6        | NA      | NA | NA | NA | -0.081 | 0.892  | NA    | NA | -0.090 | 0.943  |       |
| NM_019059    | TOMM7        | NA      | NA | NA | NA | -0.315 | 0.375  | NA    | NA | -0.172 | 0.826  |       |
| NM_014820    | TOMM70A      | NA      | NA | NA | NA | 0.715  | 0.010  | NA    | NA | 1.114  | 0.000  |       |

**Supplementary Table S5.** Quantitative data related to the transcriptomic profiles of mitochondrial iron transport genes in human islets under metabolic stress.  
 NA: Not applicable (condition not tested); ND: not detected.

|           | Accession<br>(NCBI Ref.<br>Sequence) | Gene<br>symbol | Donor #1            |                   | Donor #2            |                   | Donor #3            |                   | Donor #4            |                   | Donor #5            |                   |
|-----------|--------------------------------------|----------------|---------------------|-------------------|---------------------|-------------------|---------------------|-------------------|---------------------|-------------------|---------------------|-------------------|
|           |                                      |                | Log <sub>2</sub> FC | Adjusted <i>p</i> | Log <sub>2</sub> FC | Adjusted <i>p</i> | Log <sub>2</sub> FC | Adjusted <i>p</i> | Log <sub>2</sub> FC | Adjusted <i>p</i> | Log <sub>2</sub> FC | Adjusted <i>p</i> |
| Olea      | NM_012089                            | ABCB10         | -0.304              | 0.493             | -0.275              | 0.648             | NA                  | NA                | 0.017               | 1.000             | NA                  | NA                |
|           | NM_005689                            | ABCB6          | 0.312               | 0.565             | 0.321               | 0.587             | NA                  | NA                | 0.037               | 0.971             | NA                  | NA                |
|           | NM_007188                            | ABCB8          | 1.295               | 0.002             | 0.415               | 0.428             | NA                  | NA                | 0.651               | 0.048             | NA                  | NA                |
|           | NM_177478                            | FTMT           | ND                  | ND                | ND                  | ND                | NA                  | NA                | ND                  | ND                | NA                  | NA                |
|           | NM_001161706                         | FXN            | -0.901              | 0.308             | -0.131              | 0.990             | NA                  | NA                | 0.873               | 0.198             | NA                  | NA                |
|           | NM_031212                            | SLC25A28       | 0.286               | 0.637             | 0.049               | 0.976             | NA                  | NA                | -0.074              | 0.921             | NA                  | NA                |
|           | NM_016612                            | SLC25A37       | 0.618               | 0.220             | 0.318               | 0.630             | NA                  | NA                | 0.581               | 0.101             | NA                  | NA                |
|           | NM_017875                            | SLC25A38       | -0.693              | 0.089             | 0.300               | 0.568             | NA                  | NA                | -0.286              | 0.473             | NA                  | NA                |
|           | NM_016016                            | SLC25A39       | 1.051               | 0.001             | 0.386               | 0.359             | NA                  | NA                | 0.131               | 0.793             | NA                  | NA                |
|           | NM_016462                            | TMEM14C        | -0.323              | 0.396             | 0.358               | 0.430             | NA                  | NA                | 0.013               | 1.000             | NA                  | NA                |
| NM_000714 | TSPO                                 | 2.680          | 0.000               | 0.610             | 0.163               | NA                | NA                  | 0.399             | 0.306               | NA                | NA                  |                   |
| Palm      | NM_012089                            | ABCB10         | -0.018              | 1.000             | -0.186              | 1.000             | NA                  | NA                | NA                  | NA                | NA                  | NA                |
|           | NM_005689                            | ABCB6          | 0.387               | 0.473             | 0.609               | 1.000             | NA                  | NA                | NA                  | NA                | NA                  | NA                |
|           | NM_007188                            | ABCB8          | 1.338               | 0.002             | 0.502               | 1.000             | NA                  | NA                | NA                  | NA                | NA                  | NA                |
|           | NM_177478                            | FTMT           | ND                  | ND                | ND                  | ND                | NA                  | NA                | NA                  | NA                | NA                  | NA                |
|           | NM_001161706                         | FXN            | -2.152              | 0.022             | -0.943              | 1.000             | NA                  | NA                | NA                  | NA                | NA                  | NA                |
|           | NM_031212                            | SLC25A28       | 0.653               | 0.173             | -0.101              | 1.000             | NA                  | NA                | NA                  | NA                | NA                  | NA                |
|           | NM_016612                            | SLC25A37       | -0.113              | 0.953             | 0.017               | 1.000             | NA                  | NA                | NA                  | NA                | NA                  | NA                |
|           | NM_017875                            | SLC25A38       | -0.104              | 0.901             | 0.105               | 1.000             | NA                  | NA                | NA                  | NA                | NA                  | NA                |
|           | NM_016016                            | SLC25A39       | 1.056               | 0.001             | 0.142               | 1.000             | NA                  | NA                | NA                  | NA                | NA                  | NA                |
|           | NM_016462                            | TMEM14C        | 0.061               | 0.938             | 0.300               | 1.000             | NA                  | NA                | NA                  | NA                | NA                  | NA                |
| NM_000714 | TSPO                                 | 2.058          | 0.000               | 0.104             | 1.000               | NA                | NA                  | NA                | NA                  | NA                | NA                  |                   |

|               |              |          |        |       |        |       |        |        |        |       |        |       |
|---------------|--------------|----------|--------|-------|--------|-------|--------|--------|--------|-------|--------|-------|
| G25           | NM_012089    | ABCB10   | -0.311 | 0.440 | -0.856 | 0.068 | -0.528 | 0.319  | -0.400 | 0.199 | NA     | NA    |
|               | NM_005689    | ABCB6    | 0.007  | 1.000 | 0.279  | 0.623 | -0.145 | 0.819  | 0.004  | 1.000 | NA     | NA    |
|               | NM_007188    | ABCB8    | 1.218  | 0.004 | 0.569  | 0.202 | -0.209 | 0.708  | 0.878  | 0.001 | NA     | NA    |
|               | NM_177478    | FTMT     | ND     | ND    | ND     | ND    | ND     | ND     | ND     | ND    | NA     | NA    |
|               | NM_001161706 | FXN      | -1.268 | 0.162 | -0.273 | 0.884 | -0.113 | 0.919  | 0.618  | 0.354 | NA     | NA    |
|               | NM_031212    | SLC25A28 | 0.430  | 0.387 | 0.426  | 0.348 | 0.380  | 0.770  | 0.801  | 0.003 | NA     | NA    |
|               | NM_016612    | SLC25A37 | 0.498  | 0.297 | -0.286 | 0.692 | 0.355  | 0.352  | 0.156  | 0.692 | NA     | NA    |
|               | NM_017875    | SLC25A38 | -0.428 | 0.287 | 0.221  | 0.673 | -0.449 | 0.254  | 0.188  | 0.562 | NA     | NA    |
|               | NM_016016    | SLC25A39 | 1.312  | 0.000 | 0.486  | 0.152 | 0.263  | 0.538  | 0.607  | 0.018 | NA     | NA    |
|               | NM_016462    | TMEM14C  | -0.215 | 0.558 | 0.328  | 0.416 | -0.051 | 0.964  | 0.083  | 0.827 | NA     | NA    |
| NM_000714     | TSPO         | 3.122    | 0.000  | 0.894 | 0.014  | 0.401 | 0.278  | -0.486 | 0.123  | NA    | NA     |       |
| G25+Olea+Palm | NM_012089    | ABCB10   | NA     | NA    | NA     | NA    | -0.236 | 0.787  | NA     | NA    | 0.609  | 0.342 |
|               | NM_005689    | ABCB6    | NA     | NA    | NA     | NA    | -0.111 | 0.877  | NA     | NA    | -0.129 | 0.973 |
|               | NM_007188    | ABCB8    | NA     | NA    | NA     | NA    | -0.060 | 0.951  | NA     | NA    | 0.372  | 0.574 |
|               | NM_177478    | FTMT     | NA     | NA    | NA     | NA    | ND     | ND     | NA     | NA    | ND     | ND    |
|               | NM_001161706 | FXN      | NA     | NA    | NA     | NA    | -0.414 | 0.514  | NA     | NA    | -0.366 | 0.754 |
|               | NM_031212    | SLC25A28 | NA     | NA    | NA     | NA    | 0.571  | 0.576  | NA     | NA    | -0.278 | 0.979 |
|               | NM_016612    | SLC25A37 | NA     | NA    | NA     | NA    | 0.030  | 0.983  | NA     | NA    | -0.211 | 0.899 |
|               | NM_017875    | SLC25A38 | NA     | NA    | NA     | NA    | -0.349 | 0.433  | NA     | NA    | -0.279 | 0.756 |
|               | NM_016016    | SLC25A39 | NA     | NA    | NA     | NA    | 0.336  | 0.385  | NA     | NA    | 0.155  | 0.928 |
|               | NM_016462    | TMEM14C  | NA     | NA    | NA     | NA    | 0.121  | 0.849  | NA     | NA    | 0.015  | 1.000 |
| NM_000714     | TSPO         | NA       | NA     | NA    | NA     | 0.477 | 0.161  | NA     | NA     | 0.220 | 0.868  |       |
| G25+Olea      | NM_012089    | ABCB10   | NA     | NA    | NA     | NA    | -0.124 | 0.906  | -0.090 | 0.810 | 0.696  | 0.158 |
|               | NM_005689    | ABCB6    | NA     | NA    | NA     | NA    | -0.284 | 0.521  | 0.106  | 0.757 | -0.550 | 0.159 |
|               | NM_007188    | ABCB8    | NA     | NA    | NA     | NA    | -0.036 | 0.982  | 1.272  | 0.000 | 0.044  | 0.996 |
|               | NM_177478    | FTMT     | NA     | NA    | NA     | NA    | ND     | ND     | ND     | ND    | ND     | ND    |
|               | NM_001161706 | FXN      | NA     | NA    | NA     | NA    | -0.244 | 0.732  | 0.547  | 0.396 | -1.110 | 0.010 |
|               | NM_031212    | SLC25A28 | NA     | NA    | NA     | NA    | 0.671  | 0.360  | 1.037  | 0.000 | 0.313  | 0.857 |



|          |              |          |    |    |    |    |        |       |        |       |        |       |
|----------|--------------|----------|----|----|----|----|--------|-------|--------|-------|--------|-------|
|          | NM_016612    | SLC25A37 | NA | NA | NA | NA | 0.146  | 0.785 | 0.322  | 0.298 | -0.229 | 0.804 |
|          | NM_017875    | SLC25A38 | NA | NA | NA | NA | -0.612 | 0.066 | -0.017 | 0.975 | -0.683 | 0.048 |
|          | NM_016016    | SLC25A39 | NA | NA | NA | NA | 0.359  | 0.312 | 0.715  | 0.003 | -0.070 | 0.961 |
|          | NM_016462    | TMEM14C  | NA | NA | NA | NA | -0.036 | 0.977 | -0.089 | 0.794 | 0.088  | 0.946 |
|          | NM_000714    | TSPO     | NA | NA | NA | NA | 0.634  | 0.030 | -0.066 | 0.878 | 0.403  | 0.389 |
| G25+Palm | NM_012089    | ABCB10   | NA | NA | NA | NA | 0.379  | 0.423 | NA     | NA    | 0.655  | 0.212 |
|          | NM_005689    | ABCB6    | NA | NA | NA | NA | -0.108 | 0.852 | NA     | NA    | -0.292 | 0.649 |
|          | NM_007188    | ABCB8    | NA | NA | NA | NA | -0.507 | 0.128 | NA     | NA    | 0.350  | 0.522 |
|          | NM_177478    | FTMT     | NA | NA | NA | NA | ND     | ND    | NA     | NA    | ND     | ND    |
|          | NM_001161706 | FXN      | NA | NA | NA | NA | 0.141  | 0.848 | NA     | NA    | -0.287 | 0.777 |
|          | NM_031212    | SLC25A28 | NA | NA | NA | NA | 0.792  | 0.194 | NA     | NA    | 0.436  | 0.744 |
|          | NM_016612    | SLC25A37 | NA | NA | NA | NA | 1.000  | 0.000 | NA     | NA    | -0.190 | 0.851 |
|          | NM_017875    | SLC25A38 | NA | NA | NA | NA | -0.642 | 0.035 | NA     | NA    | -0.178 | 0.843 |
|          | NM_016016    | SLC25A39 | NA | NA | NA | NA | 0.258  | 0.479 | NA     | NA    | 0.246  | 0.673 |
|          | NM_016462    | TMEM14C  | NA | NA | NA | NA | 0.128  | 0.801 | NA     | NA    | 0.004  | 1.000 |
|          | NM_000714    | TSPO     | NA | NA | NA | NA | 0.677  | 0.013 | NA     | NA    | 0.258  | 0.704 |

**Supplementary Table S6.** Quantitative data related to the transcriptomic profiles of mitochondrial calcium transport genes in human islets upon metabolic stress. NA: Not applicable (condition not tested); ND: not detected.

|                       | Accession (NCBI Ref. Sequence) | Gene symbol | Donor #1            |                   | Donor #2            |                   | Donor #3            |                   | Donor #4            |                   | Donor #5            |                   |
|-----------------------|--------------------------------|-------------|---------------------|-------------------|---------------------|-------------------|---------------------|-------------------|---------------------|-------------------|---------------------|-------------------|
|                       |                                |             | Log <sub>2</sub> FC | Adjusted <i>p</i> | Log <sub>2</sub> FC | Adjusted <i>p</i> | Log <sub>2</sub> FC | Adjusted <i>p</i> | Log <sub>2</sub> FC | Adjusted <i>p</i> | Log <sub>2</sub> FC | Adjusted <i>p</i> |
| Olea                  | NM_001270679                   | MCU         | -0.045              | 0.974             | -0.080              | 0.933             | NA                  | NA                | -0.134              | 0.801             | NA                  | NA                |
|                       | NM_001031713                   | MCUR1       | -0.081              | 0.913             | -0.131              | 0.841             | NA                  | NA                | 0.116               | 0.833             | NA                  | NA                |
|                       | NM_006077                      | MICU1       | -0.282              | 0.503             | 0.094               | 0.895             | NA                  | NA                | -0.354              | 0.331             | NA                  | NA                |
|                       | NM_152726                      | MICU2       | -0.852              | 0.005             | 0.134               | 0.832             | NA                  | NA                | -0.154              | 0.768             | NA                  | NA                |
|                       | NM_181723                      | MICU3       | -0.939              | 0.008             | -0.526              | 0.400             | NA                  | NA                | 0.183               | 0.746             | NA                  | NA                |
|                       | NM_024959                      | SLC8B1      | 0.742               | 0.104             | 0.546               | 0.309             | NA                  | NA                | -0.113              | 0.871             | NA                  | NA                |
|                       | NM_033318                      | SMDT1       | 0.754               | 0.048             | 0.289               | 0.558             | NA                  | NA                | 0.101               | 0.857             | NA                  | NA                |
| Palm                  | NM_001270679                   | MCU         | -0.032              | 0.997             | -0.030              | 1.000             | NA                  | NA                | NA                  | NA                | NA                  | NA                |
|                       | NM_001031713                   | MCUR1       | -0.188              | 0.767             | -0.048              | 1.000             | NA                  | NA                | NA                  | NA                | NA                  | NA                |
|                       | NM_006077                      | MICU1       | 0.075               | 0.935             | -0.146              | 1.000             | NA                  | NA                | NA                  | NA                | NA                  | NA                |
|                       | NM_152726                      | MICU2       | -0.300              | 0.450             | 0.107               | 1.000             | NA                  | NA                | NA                  | NA                | NA                  | NA                |
|                       | NM_181723                      | MICU3       | -0.562              | 0.161             | 0.289               | 1.000             | NA                  | NA                | NA                  | NA                | NA                  | NA                |
|                       | NM_024959                      | SLC8B1      | 0.276               | 0.719             | -0.676              | 1.000             | NA                  | NA                | NA                  | NA                | NA                  | NA                |
|                       | NM_033318                      | SMDT1       | 0.918               | 0.013             | 0.260               | 1.000             | NA                  | NA                | NA                  | NA                | NA                  | NA                |
| G25                   | NM_001270679                   | MCU         | 0.109               | 0.828             | -0.075              | 0.947             | 0.040               | 0.980             | -0.686              | 0.012             | NA                  | NA                |
|                       | NM_001031713                   | MCUR1       | 0.073               | 0.934             | -0.407              | 0.348             | 0.000               | 1.000             | 0.231               | 0.459             | NA                  | NA                |
|                       | NM_006077                      | MICU1       | -0.100              | 0.847             | -0.092              | 0.891             | -0.078              | 0.924             | 0.635               | 0.014             | NA                  | NA                |
|                       | NM_152726                      | MICU2       | -0.819              | 0.006             | 0.273               | 0.545             | -0.304              | 0.476             | 0.269               | 0.395             | NA                  | NA                |
|                       | NM_181723                      | MICU3       | -1.102              | 0.002             | -0.640              | 0.349             | -0.200              | 0.810             | -0.106              | 0.820             | NA                  | NA                |
|                       | NM_024959                      | SLC8B1      | 0.913               | 0.025             | 0.394               | 0.498             | 0.766               | 0.013             | -0.593              | 0.082             | NA                  | NA                |
|                       | NM_033318                      | SMDT1       | 1.093               | 0.001             | 0.789               | 0.018             | -0.472              | 0.155             | -0.048              | 0.910             | NA                  | NA                |
| G25+<br>Olea+<br>Palm | NM_001270679                   | MCU         | NA                  | NA                | NA                  | NA                | 0.009               | 1.000             | NA                  | NA                | -0.323              | 0.650             |
|                       | NM_001031713                   | MCUR1       | NA                  | NA                | NA                  | NA                | 0.198               | 0.731             | NA                  | NA                | 0.257               | 0.807             |

|          |              |        |    |    |    |    |        |       |        |       |        |       |
|----------|--------------|--------|----|----|----|----|--------|-------|--------|-------|--------|-------|
|          | NM_006077    | MICU1  | NA | NA | NA | NA | -0.047 | 0.963 | NA     | NA    | 0.061  | 1.000 |
|          | NM_152726    | MICU2  | NA | NA | NA | NA | -0.091 | 0.902 | NA     | NA    | -0.226 | 0.821 |
|          | NM_181723    | MICU3  | NA | NA | NA | NA | -0.779 | 0.123 | NA     | NA    | -0.343 | 0.742 |
|          | NM_024959    | SLC8B1 | NA | NA | NA | NA | 0.647  | 0.053 | NA     | NA    | 0.216  | 0.923 |
|          | NM_033318    | SMDT1  | NA | NA | NA | NA | -0.435 | 0.205 | NA     | NA    | -0.063 | 1.000 |
| G25+Olea | NM_001270679 | MCU    | NA | NA | NA | NA | 0.014  | 1.000 | -0.239 | 0.426 | 0.081  | 0.962 |
|          | NM_001031713 | MCUR1  | NA | NA | NA | NA | -0.028 | 0.990 | -0.034 | 0.934 | 0.793  | 0.011 |
|          | NM_006077    | MICU1  | NA | NA | NA | NA | -0.116 | 0.845 | 0.328  | 0.230 | 0.165  | 0.838 |
|          | NM_152726    | MICU2  | NA | NA | NA | NA | -0.381 | 0.301 | 0.302  | 0.295 | -0.087 | 0.949 |
|          | NM_181723    | MICU3  | NA | NA | NA | NA | -0.786 | 0.081 | 0.090  | 0.822 | 0.230  | 0.804 |
|          | NM_024959    | SLC8B1 | NA | NA | NA | NA | 0.819  | 0.006 | -0.453 | 0.177 | 0.071  | 0.988 |
|          | NM_033318    | SMDT1  | NA | NA | NA | NA | -0.410 | 0.224 | 0.077  | 0.823 | 0.071  | 0.965 |
|          |              | MCU    | NA | NA | NA | NA | 0.136  | 0.793 | NA     | NA    | 0.081  | 0.962 |
| G25+Palm |              | MCUR1  | NA | NA | NA | NA | 0.161  | 0.749 | NA     | NA    | 0.793  | 0.011 |
|          |              | MICU1  | NA | NA | NA | NA | -0.012 | 1.000 | NA     | NA    | 0.165  | 0.838 |
|          |              | MICU2  | NA | NA | NA | NA | -0.169 | 0.711 | NA     | NA    | -0.087 | 0.949 |
|          |              | MICU3  | NA | NA | NA | NA | -0.143 | 0.855 | NA     | NA    | 0.230  | 0.804 |
|          |              | SLC8B1 | NA | NA | NA | NA | 0.656  | 0.030 | NA     | NA    | 0.071  | 0.988 |
|          |              | SMDT1  | NA | NA | NA | NA | -0.458 | 0.124 | NA     | NA    | 0.071  | 0.965 |

| Species             | Accession<br>NCBI Ref Seq. | Primer name                                                                  | Sequence                                                               |
|---------------------|----------------------------|------------------------------------------------------------------------------|------------------------------------------------------------------------|
| <i>Homo sapiens</i> | NM_001358345.2             | Solute carrier family 25 member 10 (SLC25A10),<br>transcript variant 1, mRNA | Fwd: 5'- ATCCTGGCACTCTACAGCGG -3'<br>Rev: 5'- GTCTCGTAGATGGCGAACCG -3' |
| <i>Homo sapiens</i> | NM_003562.5                | Solute carrier family 25 member 11 (SLC25A11),<br>transcript variant 1, mRNA | Fwd: 5'-TGCCTTTGTGGGAACACCAG-3'<br>Rev: 5'-ACATTTTTGTAGCCACGGCG-3'     |
| <i>Homo sapiens</i> | NM_001191060.2             | Solute carrier family 25 member 22 (SLC25A22),<br>transcript variant 1, mRNA | Fwd: 5'- GTGGCATTGCCGGTCTCTAC-3'<br>Rev: 5'- GAGCGGGAAGTACACCACAG-3'   |
| <i>Homo sapiens</i> | NM_001358345.2             | Solute carrier family 8 member B1 (SLC8B1), transcript<br>variant 3, mRNA    | Fwd: 5'- CCAGCTTCAGGTGTGAACCAG-3'<br>Rev:5'- GAAGTCACAGCGGTCAGAGACA-3' |
| <i>Homo sapiens</i> | NM_012458.4                | Translocase of inner mitochondrial membrane 13<br>(TIMM13), mRNA             | Fwd: 5'- GTGAAAGTGCAGATCGCCGT-3'<br>Rev:5'- AGCCCCAGGTTTCCCTATAC-3'    |
| <i>Homo sapiens</i> | NM_021130.5                | Peptidylprolyl isomerase A (PPIA), transcript variant 1,<br>mRNA             | Fwd: 5'- ATCTGCACTGCCAAGACTGA-3'<br>Rev: 5'-TCTTGCTGGTCTTGCCATTC-3'    |

**Supplementary Table S7:** Primers used for quantitative RT-PCR analysis

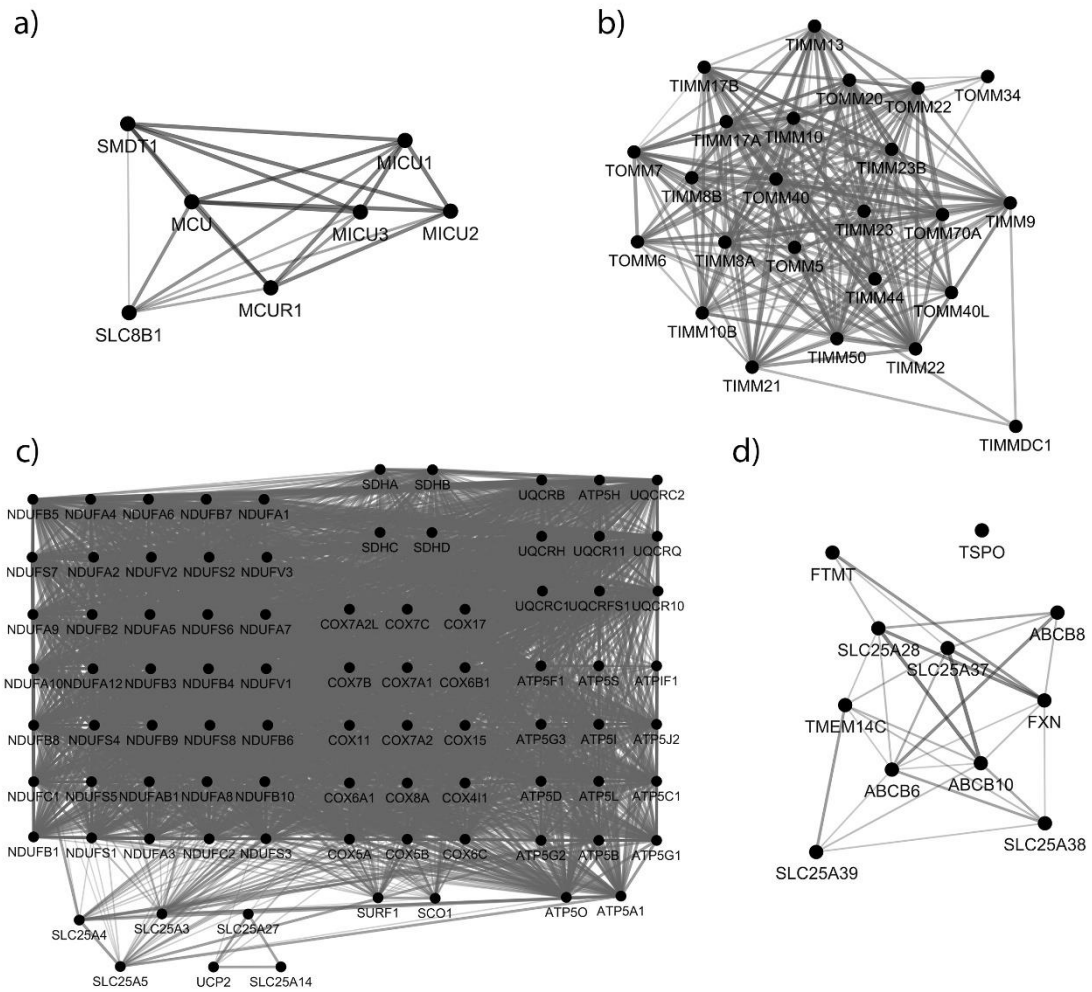

**Supplementary Figure S1.** Functional interaction network of human **(a)** mitochondrial calcium transport genes; **(b)** outer and inner mitochondrial membrane translocases TOM/TIM machinery; **(c)** electron transport chain machinery and related carriers; **(d)** mitochondrial iron transport genes. Nodes were connected using the STRING interaction knowledgebase with a confidence score >0.4.

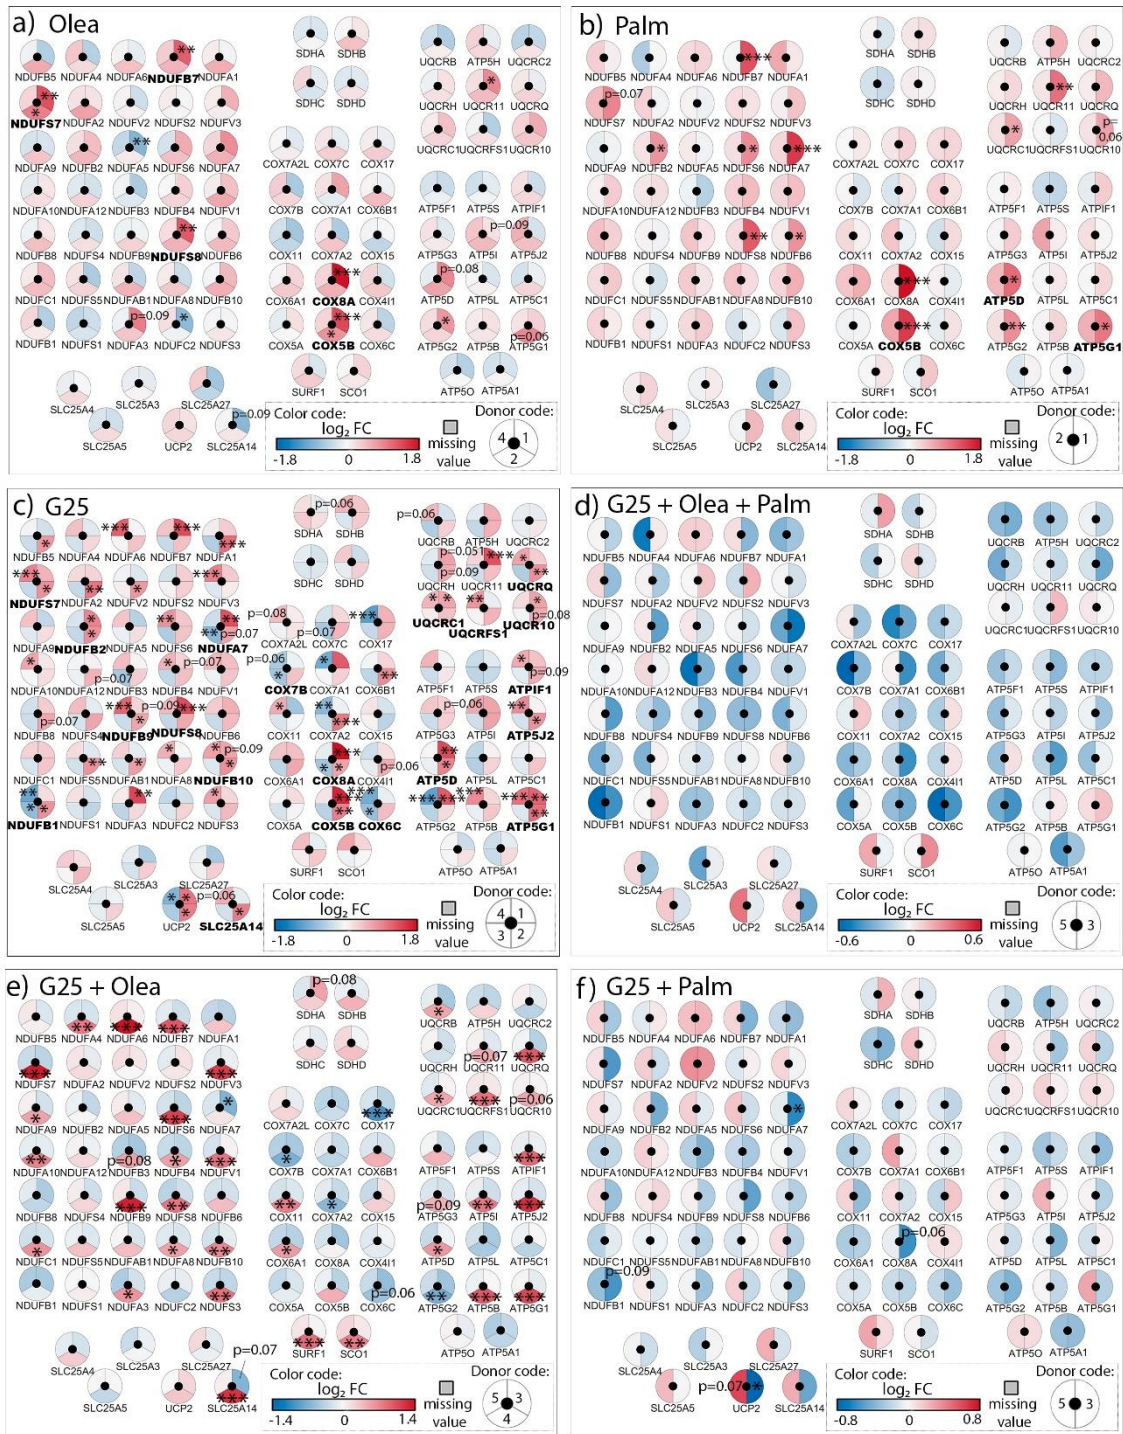

**Supplementary Figure S2.** Effects of high 25 mM glucose (G25) and 0.4 mM oleate (Olea) or palmitate (Palm) on the transcriptional regulation of the electron transport chain machinery. Human islets were exposed to (a) Olea at G5.5, (b) Palm at G5.5, (c) G25, (d) G25+Olea+Palm, (e) G25+Olea, and (f) G25+Palm for 3 days before RNA-Seq analysis. Effects of culture conditions on transcript levels are compared to standard G5.5 medium and shown as upregulated (red), downregulated (blue), or unchanged (white). Missing values are represented in grey. Each disk is split into individual changes for the different donors. Color code reflects the transcriptional changes in log<sub>2</sub> fold changes (log<sub>2</sub> FC) for that particular gene in individual donors. \*adjusted p<0.05, \*\*adjusted p<0.01, \*\*\*adjusted p<0.001 between control 5.5 mM glucose and the specific culture condition.

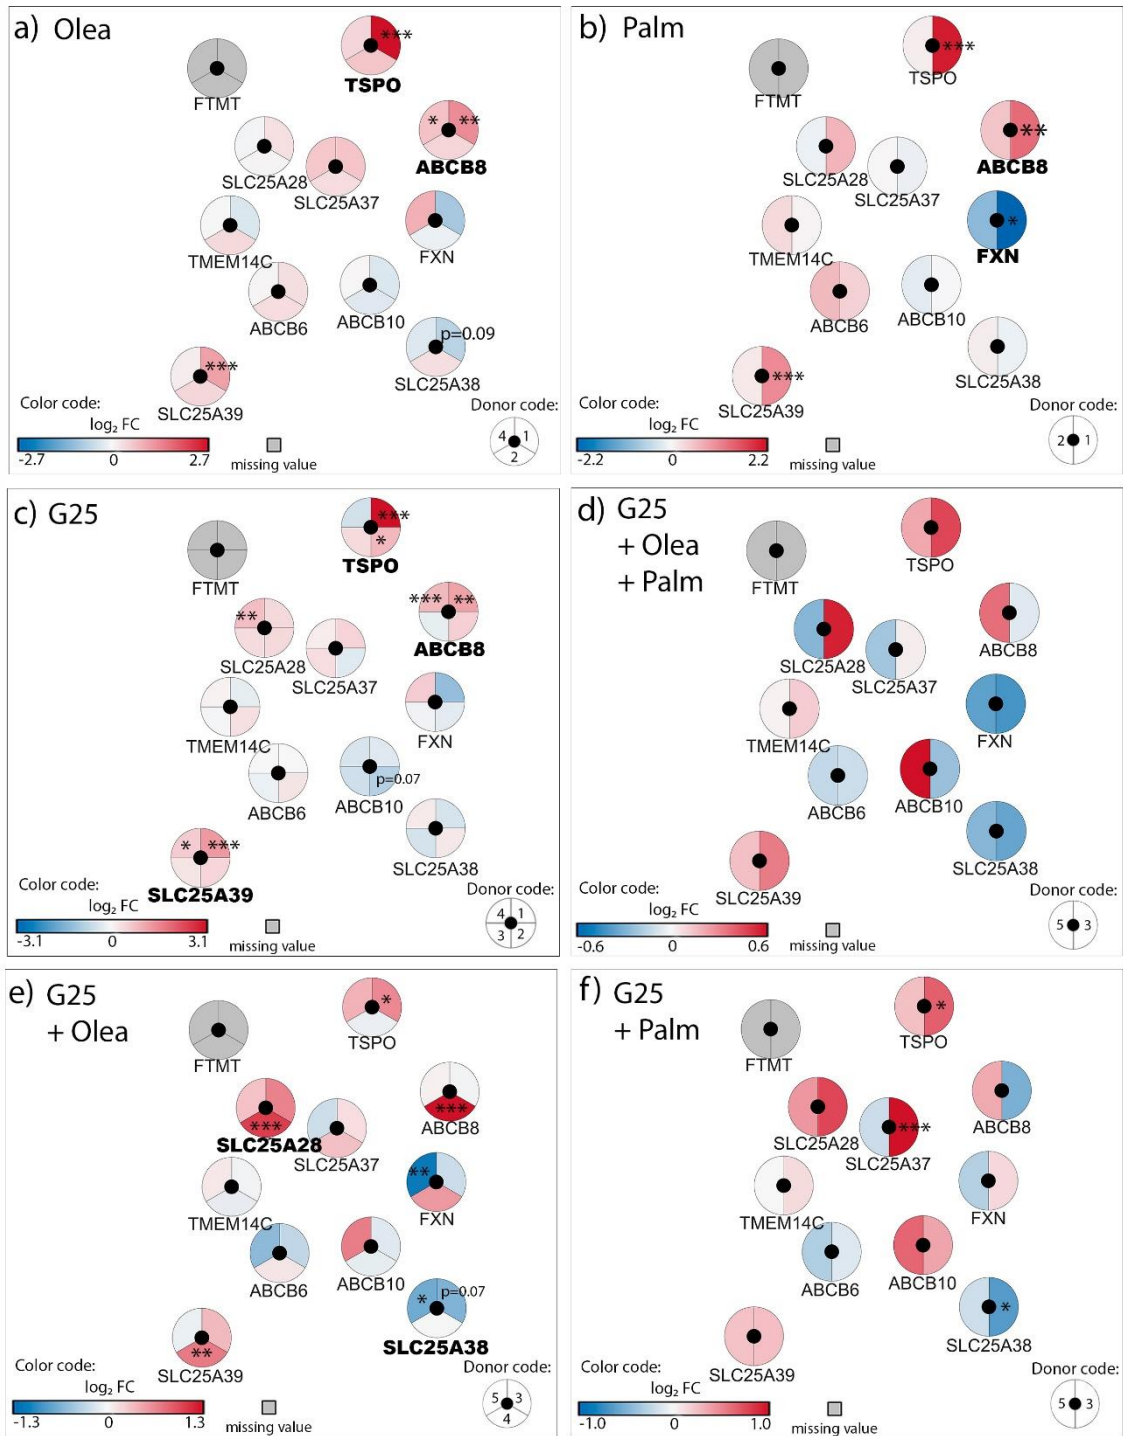

**Supplementary Figure S3.** Effects of high 25 mM glucose (G25) and 0.4 mM oleate (Olea) or palmitate (Palm) on the transcriptional regulation of mitochondrial iron transport genes. Human islets were exposed to (a) Olea at G5.5, (b) Palm at G5.5, (c) G25, (d) G25+Olea+Palm, (e) G25+Olea, and (f) G25+Palm for 3 days before RNA-Seq analysis. Effects of culture conditions on transcript levels are compared to standard G5.5 medium and shown as upregulated (red), downregulated (blue), or unchanged (white). Missing values are represented in grey. Each disk is split into individual changes for the different donors. Color code reflects the transcriptional changes in  $\log_2$  fold changes ( $\log_2$  FC) for that particular gene in individual donors. \*adjusted  $p < 0.05$ , \*\*adjusted  $p < 0.01$ , \*\*\*adjusted  $p < 0.001$  between control 5.5 mM glucose and the specific culture condition.

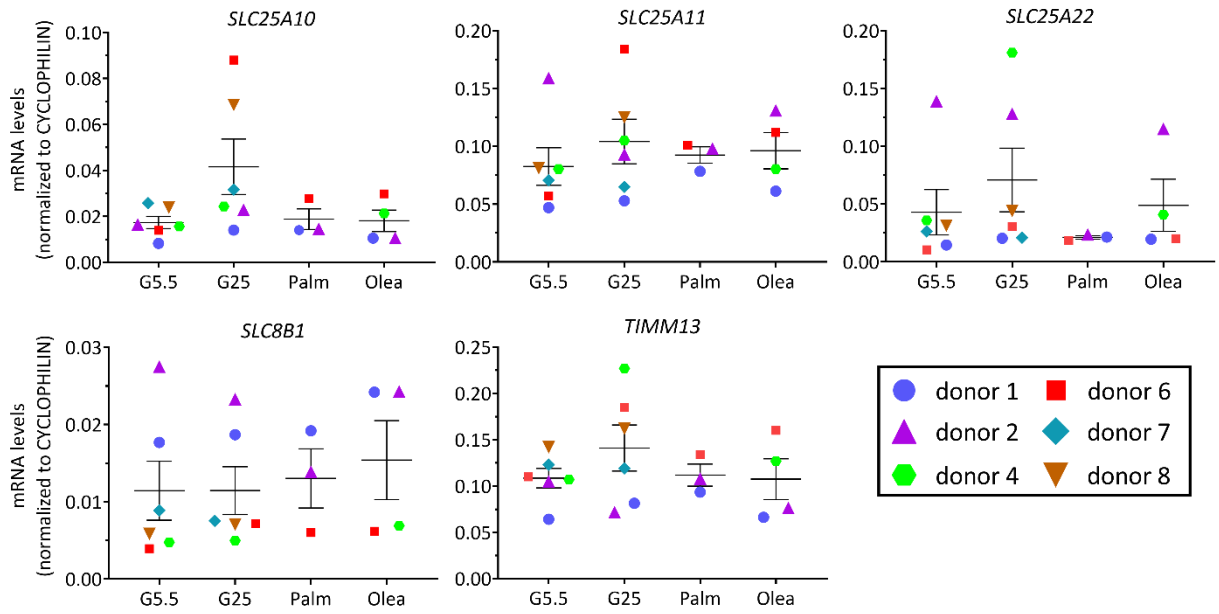

**Supplementary Figure S4:** Effects of high 25 mM glucose (G25) and 0.4 mM palmitate (Palm) or oleate (Olea) on mRNA levels of selected genes in human islets measured by quantitative RT-PCR, normalized to cyclophilin A (*PPIA*). See Supplementary Table S1 for details on the donors.
